# Supplementary material for: Assessment of a Novel Adult Mass-Rearing Cage for Aedes albopictus (Skuse) and Anopheles arabiensis (Patton)
Source: MDPI journal article supplement (doi:10.3390/insects11110801), 2020-11-13
Supplement: s1 [file s1]

## Supplementary file: SCRIPTS/OUTPUT: statistical analyses

---

### Assessment of a novel adult mass-rearing cage for *Aedes albopictus* (Skuse) and *Anopheles arabiensis* (Patton)

Hamidou Maïga<sup>1,2\*</sup>, Wadaka Mamai<sup>1,3</sup>, Nanwintoum Séverin Bimbilé Somda<sup>1,2</sup>, Thomas Wallner<sup>1</sup>, Serge Poda<sup>2</sup>, Gustavo Salvador Herranz<sup>4</sup>, Rafael Argiles Herrero<sup>1</sup>, Hanano Yamada<sup>1</sup>, Jeremy Bouyer<sup>1</sup>

---

```
#####
#####
##### 1. Aedes albopictus egg production #####
#####
#####
#----- Loading the dataset -----#

data<-read.csv2("aedes.egg.production.csv", dec=".", header=TRUE)
str(data)

data <- transform(data,
                   replicate=factor(replicate),
                   cage=factor(cage),
                   cage2=factor(cage2),
                   week=factor(week))

str(data)
summary (data)
attach(data)

#----- Statistical analysis -----#

library(lme4)
mod <- lmer(npf2 ~ week + (1|cage2))
summary(mod)

par(mfrow=c(2,2))
hist(resid(mod),freq=FALSE, ylim = c(0,0.5))
lines(density(resid(mod)), col="red")
library(car)
qqPlot(resid(mod))
plot(fitted(mod), resid(mod))
abline(h=0)
shapiro.test(resid(mod))

mod <- glmer(npf2 ~ week + (1|cage2), family=poisson)
summary(mod)

overdisp_fun <- function(model) {
  rdf <- df.residual(model)
  rp <- residuals(model,type="pearson")
  Pearson.chisq <- sum(rp^2)
  prat <- Pearson.chisq/rdf
}
```

```

    pval <- pchisq(Pearson.chisq, df=rdf, lower.tail=FALSE)
    c(chisq=Pearson.chisq, rdf=rdf, ratio=prat ,p.val=pval)
  }
overdisp_fun(mod)

mod2 <- update(mod,~.-week)
anova(mod,mod2)
library(multcomp)
summary(glht(mod,linfct = mcp(week="Tukey"))))

#----- Plots -----#

mean(npf2)
sd(npf2)/sqrt(nrow(data))

par(mfrow=c(1,2))
boxplot(npf2~week,ylab="Number of eggs produced/female", xlab="Egg
collection")
(m<-tapply(npf2,week,mean))
(se<-tapply(npf2,week,sd)/sqrt(table(week)))
bar<-barplot(m,beside=T,las=1,cex.axis=0.8,ylab="Mean number of eggs
produced/female (±se)", xlab="Egg collection",ylim=c(0,50))
arrows(bar,m+se,bar,m-se,angle=90,code=3,length=0.05)

##### END
#####

#####
#####
##### 2. Aedes albopictus egg hatching rate
#####
#####
#####

#----- Loading the dataset -----#

data<-read.csv2("aedes.egg.hatching.csv", dec=".", header=TRUE)
str(data)
data <- transform(data,
  replicate=factor(replicate),
  cage=factor(cage),
  cage2=factor(cage2),
  week=factor(week),
  eggorigin=factor(eggorigin),
  eggsample=factor(eggsample))
str(data)
summary (data)
attach(data)

#----- Statistical analysis -----#

y <- cbind(hatched,unhatched)

library(lme4)
mod <- glmer(y ~ week*eggorigin + (1|cage2), family = "binomial")
summary(mod)

```

```

overdisp_fun <- function(model) {
  rdf <- df.residual(model)
  rp <- residuals(model,type="pearson")
  Pearson.chisq <- sum(rp^2)
  prat <- Pearson.chisq/rdf
  pval <- pchisq(Pearson.chisq, df=rdf, lower.tail=FALSE)
  c(chisq=Pearson.chisq, rdf=rdf, ratio=prat ,p.val=pval)
}
overdisp_fun(mod)

data$obs<- 1:nrow(data)
str(data)
mod <- glmer(y ~ week*eggorigin + (1|cage2) + (1|obs), data=data, family =
"binomial")
summary(mod)
mod2 <- update(mod,~.-week:eggorigin)
anova(mod,mod2)
summary(mod2)
mod3 <- update(mod2,~.-eggorigin)
anova(mod2,mod3)
mod4 <- update(mod2,~.-week)
anova(mod2,mod4)
library(multcomp)
summary(glht(mod2,linfct = mcp(week="Tukey"))))
summary(emmeans(mod2,pairwise~week), infer=TRUE, type="response")
summary(emmeans(mod2,pairwise~eggorigin), infer=TRUE, type="response")

#Full model
mod <- glmer(y ~ week*eggorigin + (1|cage2) + (1|obs), data=data, family =
"binomial")
summary(mod)

# OR
exp(cbind(OR=fixef(mod)))

#95% CI
exp(confint(mod, metho="Wald"))
#----- Plots -----#

(prop<-sum(hatched)/sum(hatched+unhatched))
(IC<-1.96*sqrt(prop*(1-prop)/nrow(data)))

par(mfrow=c(1,2))
(p<-tapply(hatched,week,sum)/tapply(hatched+unhatched,week,sum))
(IC<-1.96*sqrt(p*(1-p)/tapply(hatched+unhatched,week,sum)))
bar<-barplot(p,beside=T,las=1,cex.axis=0.8,ylab="Egg hatch rate (±95%CI)",
             xlab="Egg collection", ylim=c(0,1), cex.names=0.9,cex.lab=1)
arrows(bar,p+IC,bar,p-IC,angle=90,code=3,length=0.05)

(p<-tapply(hatched,eggorigin,sum)/tapply(hatched+unhatched,eggorigin,sum))
(IC<-1.96*sqrt(p*(1-p)/tapply(hatched+unhatched,eggorigin,sum)))
bar<-barplot(p,beside=T,las=1,cex.axis=0.8,ylab="Egg hatch rate (±95%CI)",
             xlab="Egg origin", ylim=c(0,1), cex.names=0.9,cex.lab=1)
arrows(bar,p+IC,bar,p-IC,angle=90,code=3,length=0.05)

##### END
#####

#####
#####

```

```
##### 3. Aedes albopictus egg floating rate
#####
#####
```

```
#-----dataset -----#
```

```
data<-read.csv2("aedes.egg.floating.csv", dec=".", header=TRUE)
str(data)
data <- transform(data,
                    replicate=factor(replicate),
                    cage=factor(cage),
                    cage2=factor(cage2),
                    week=factor(week))

str(data)
summary (data)
attach(data)
```

```
#----- Statistical analysis -----#
```

```
y <- cbind(floating,paper)
```

```
library(lme4)
mod <- glmer(y ~ week + (1|cage2),family=binomial)
summary(mod)
```

```
overdisp_fun <- function(model) {
  rdf <- df.residual(model)
  rp <- residuals(model,type="pearson")
  Pearson.chisq <- sum(rp^2)
  prat <- Pearson.chisq/rdf
  pval <- pchisq(Pearson.chisq, df=rdf, lower.tail=FALSE)
  c(chisq=Pearson.chisq, rdf=rdf, ratio=prat ,p.val=pval)
}
overdisp_fun(mod)
data$obs<- 1:nrow(data)
str(data)
mod <- glmer(y ~ week + (1|cage2) + (1|obs), data=data, family =
"binomial")
summary(mod)
mod2 <- update(mod,~.-week)
anova(mod,mod2)
```

```
#----- Plots -----#
```

```
(prop<-sum(floating)/sum(floating+paper))
(IC<-1.96*sqrt(prop*(1-prop)/sum(floating+paper)))

(p<-tapply(floating,week,sum)/tapply(floating+paper,week,sum))
(IC<-1.96*sqrt(p*(1-p)/tapply(floating+paper,week,sum)))
bar<-barplot(p,beside=T,las=1,cex.axis=0.8,ylab="Egg floating rate
(±95%CI)",
              xlab="Egg collection", ylim=c(0,1), cex.names=0.9,cex.lab=1)
arrows(bar,p+IC,bar,p-IC,angle=90,code=3,length=0.05)
```

```
##### END
#####

#####
#####
##### 4. Aedes adult mortality rate
#####
#####
#####

#----- Loading the dataset -----#

data<-read.csv2("aedes.daily.mortality.csv", dec=".", header=TRUE)
str(data)
data$cage <- as.factor(data$cage)
data$square <- as.factor(data$square)
data$sex <- as.factor(data$sex)

str(data)
summary (data)
attach(data)

#----- Statistical analysis -----#

library(lme4)
mod <- lmer(dailymortality ~ sex + (1|cage))
summary(mod)
par(mfrow=c(2,2))
hist(resid(mod),freq=FALSE, ylim = c())
lines(density(resid(mod)), col="red")
library(car)
qqPlot(resid(mod)) # good for normality
plot(fitted(mod),resid(mod))
abline(h=0) # good for variance
shapiro.test(resid(mod)) # p-value = 0.5383 good for normality
mod2 <- update(mod,~.-sex)
anova(mod,mod2)
#----- Plots -----#

mean(dailymortality)
sd(dailymortality)/sqrt(3)
par(mfrow=c(1,2))
boxplot(dailymortality~sex,ylab="Constant daily mortality rate",
xlab="Sex")
(m<-tapply(dailymortality,sex,mean))
(se<-tapply(dailymortality,sex,sd)/sqrt(3))
bar<-barplot(m,beside=T,las=1,cex.axis=0.8,ylab="Mean constant daily
mortality rate (±se)", xlab="Sex",ylim=c(0,0.16))
arrows(bar,m+se,bar,m-se,angle=90,code=3,length=0.05)

##### END
#####???
```

```
#####
#####
##### 5. Anopheles arabiensis egg production
#####
#####
#####
```

```
#----- Loading the dataset -----#
```

```
data<-read.csv2("anopheles.egg.production.csv", dec=".", header=TRUE)
str(data)
data <- transform(data,
                    cage=factor(cage),
                    week=factor(week),
                    eggbatch=factor(eggbatch),
                    cagetype=factor(cagetype))

str(data)
summary (data)
attach(data)

library(lme4)
mod <- lmer(npf2 ~ cagetype*eggbatch + (1|cage))
summary(mod)
```

```
par(mfrow=c(2,2))
hist(resid(mod),freq=FALSE, ylim = c(0,0.3))
lines(density(resid(mod)), col="red")
library(car)
qqPlot(resid(mod))
plot(fitted(mod), resid(mod))
abline(h=0)      # p-value = 0.3534  # good
```

```
mod <- glmer(npf2 ~ cagetype*eggbatch + (1|cage), family=poisson)
summary(mod)
```

```
overdisp_fun <- function(model) {
  rdf <- df.residual(model)
  rp <- residuals(model,type="pearson")
  Pearson.chisq <- sum(rp^2)
  prat <- Pearson.chisq/rdf
  pval <- pchisq(Pearson.chisq, df=rdf, lower.tail=FALSE)
  c(chisq=Pearson.chisq, rdf=rdf, ratio=prat ,p.val=pval)
}
overdisp_fun(mod)
```

```
#----- Statistical analysis -----#
```

```
mod2 <- update(mod,~.-cagetype:eggbatch)
anova(mod,mod2)
library(car)
Anova(mod,Type=III)

library(multcomp)
summary(glht(mod,linfct = mcp(eggbatch="Tukey"))))
library(emmeans)
summary(emmeans(mod,pairwise~cagetype|eggbatch),infer=TRUE,
type="response")
```

```

#----- Plots -----#

mean(neggs)
sd(neggs)/sqrt(nrow(data))

par(mfrow=c(1,2))
boxplot(npf2 ~ cagetype,ylab="Number of eggs produced/female", xlab="Cage
type")

(m<-tapply(npf2,cagetype,mean))
(se<-tapply(npf2,cagetype,sd)/sqrt(table(cagetype)))
bar<-barplot(m,beside=T,las=1,cex.axis=0.8,ylab="Mean number of eggs
produced/female ( $\pm$ se)", xlab="Cage type",ylim=c(0,35))
arrows(bar,m+se,bar,m-se,angle=90,code=3,length=0.05)

boxplot(npf2 ~ eggbatch,ylab="Number of eggs produced/female", xlab="Egg
batch")
(m<-tapply(npf2,eggbatch,mean))
(se<-tapply(npf2,eggbatch,sd)/sqrt(table(eggbatch)))
bar<-barplot(m,beside=T,las=1,cex.axis=0.8,ylab="Mean number of eggs
produced/female ( $\pm$ se)", xlab="Egg collection",ylim=c(0,35))
arrows(bar,m+se,bar,m-se,angle=90,code=3,length=0.05)

boxplot(npf2~cagetype:eggbatch, sep = "_", lex.order = TRUE, col =
c("gray25", "gray70","gray90"),ylab="Number of eggs produced by female",
xlab="Egg batch")
(m<-tapply(npf2,list(eggbatch,cagetype),mean))
(se<-
tapply(npf2,list(eggbatch,cagetype),sd)/sqrt(table(eggbatch,cagetype)))
bar<-barplot(m,beside=T,las=1,cex.axis=0.8,ylab="Mean number of eggs
produced/female ( $\pm$ se)", xlab=" Egg collection x cage type
interaction",ylim=c(0,35))
arrows(bar,m+se,bar,m-se,angle=90,code=3,length=0.05)
legend(6.6,38,levels(eggbatch), fill=c("gray25", "gray70","gray90"),xpd =
T)

(m<-tapply(npf2,list(cagetype,eggbatch),mean))
(se<-
tapply(npf2,list(cagetype,eggbatch),sd)/sqrt(table(cagetype,eggbatch)))
bar<-barplot(m,beside=T,las=1,cex.axis=0.8,ylab="Mean number of eggs
produced by female ( $\pm$ se)", xlab=" Egg collection : cage type
interaction",ylim=c(0,35))
arrows(bar,m+se,bar,m-se,angle=90,code=3,length=0.05)
legend(6.6,38,levels(cagetype), fill=c("gray25", "gray70","gray90"),xpd =
T)

##### END
#####
#####

```

## OUTPUT

```
> #####
#####
> ##### 1. Aedes albopictus egg production #####
#####
> #####
#####
>
>
> #----- Loading the dataset -----#
>
> library(readr)
> data <- read_delim("statsmaiga/MRC optimization/Insect ms DATA/data_resub
m/aedes.egg.production.csv",
+                    ";", escape_double = FALSE, trim_ws =
TRUE)
Parsed with column specification:
cols(
  replicate = col_character(),
  cage = col_character(),
  cage2 = col_character(),
  week = col_character(),
  npf = col_double(),
  npf2 = col_double()
)
> View(data)
>
> str(data)
tibble [15 x 6] (S3: spec_tbl_df/tbl_df/tbl/data.frame)
 $ replicate: chr [1:15] "R1" "R1" "R1" "R1" ...
 $ cage      : chr [1:15] "C1" "C2" "C3" "C1" ...
 $ cage2     : chr [1:15] "C1" "C2" "C3" "C1" ...
 $ week      : chr [1:15] "Week 1" "Week 1" "Week 1" "Week 2" ...
 $ npf       : num [1:15] 49.7 45.5 48.3 31 33 ...
 $ npf2      : num [1:15] 50 45 48 31 33 38 19 18 22 31 ...
 - attr(*, "spec")=
 .. cols(
 ..   replicate = col_character(),
 ..   cage = col_character(),
 ..   cage2 = col_character(),
 ..   week = col_character(),
 ..   npf = col_double(),
 ..   npf2 = col_double()
 .. )
> data <- transform(data,
+                   replicate=factor(replicate),
+                   cage=factor(cage),
+                   cage2=factor(cage2),
+                   week=factor(week))
>
> str(data)
'data.frame': 15 obs. of 6 variables:
 $ replicate: Factor w/ 2 levels "R1","R2": 1 1 1 1 1 1 1 1 1 2 ...
 $ cage      : Factor w/ 3 levels "C1","C2","C3": 1 2 3 1 2 3 1 2 3 1 ...
 $ cage2     : Factor w/ 5 levels "C1","C2","C3",..: 1 2 3 1 2 3 1 2 3 4 ...
 $ week      : Factor w/ 3 levels "Week 1","Week 2",..: 1 1 1 2 2 2 3 3 3 1
 ...
 $ npf       : num 49.7 45.5 48.3 31 33 ...
 $ npf2      : num 50 45 48 31 33 38 19 18 22 31 ...
> summary (data)
```



```

replicate cage    cage2      week      npf      npf2
R1:9      C1:6    C1:3    Week 1:5    Min.    :14.20    Min.    :14.00
R2:6      C2:6    C2:3    Week 2:5    1st Qu.:20.69    1st Qu.:20.50
          C3:3    C3:3    Week 3:5    Median :31.01    Median :31.00
          C4:3          Mean  :30.89    Mean   :30.67
          C5:3          3rd Qu.:39.41    3rd Qu.:39.00
                          Max.    :49.66    Max.    :50.00

> attach(data)
>
> #----- Statistical analysis -----#
>
> library(lme4)
Le chargement a nécessité le package : Matrix
> mod <- lmer(npf2 ~ week + (1|cage2), data=data)
> summary(mod)
Linear mixed model fit by REML ['lmerMod']
Formula: npf2 ~ week + (1 | cage2)
Data: data

REML criterion at convergence: 74.1

Scaled residuals:
    Min       1Q   Median       3Q      Max
-2.02481 -0.18359  0.02384  0.40967  1.55186

Random effects:
Groups   Name             Variance Std.Dev.
cage2    (Intercept)    18.22     4.268
Residual                  10.18     3.191
Number of obs: 15, groups:  cage2, 5

Fixed effects:
              Estimate Std. Error t value
(Intercept)    42.800      2.383    17.96
weekWeek 2    -11.000      2.018     -5.45
weekWeek 3    -25.400      2.018    -12.59

Correlation of Fixed Effects:
              (Intr) wekWk2
weekWeek 2  -0.423
weekWeek 3  -0.423  0.500
>
> par(mfrow=c(2,2))
> hist(resid(mod),freq=FALSE, ylim = c(0,0.5))
> lines(density(resid(mod)), col="red")
>
> library(car)
Le chargement a nécessité le package : carData
Registered S3 methods overwritten by 'car':
  method                               from
  influence.merMod                      lme4
  cooks.distance.influence.merMod      lme4
  dfbeta.influence.merMod              lme4
  dfbetas.influence.merMod             lme4
>
> qqPlot(resid(mod))
[1] 10 1
> plot(fitted(mod), resid(mod))
> abline(h=0)

```

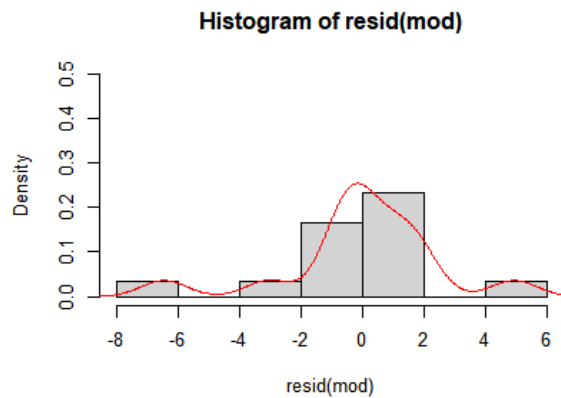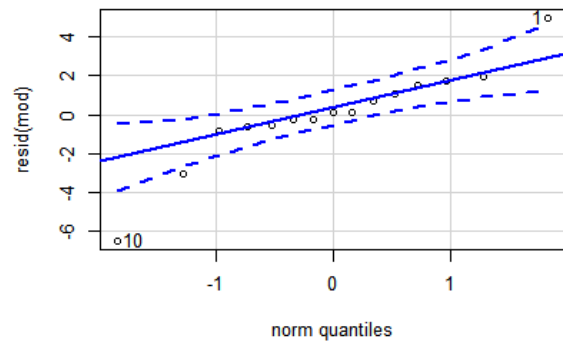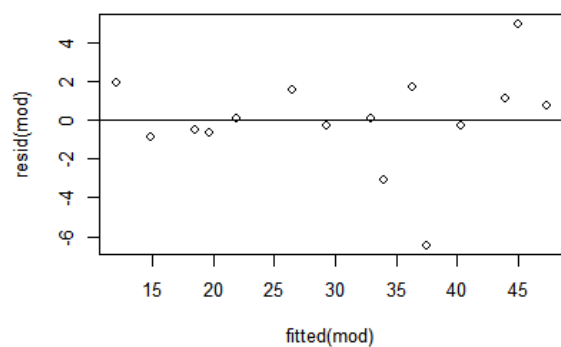

```
> shapiro.test(resid(mod))
OR NORMALITY
```

```
## p-value = 0.09953 > 0.05 GOOD F
```

Shapiro-Wilk normality test

```
data: resid(mod)
W = 0.90127, p-value = 0.09953
```

```
>
> mod <- glmer(npf2 ~ week + (1|cage2), family=poisson, data=data)
> summary(mod)
Generalized linear mixed model fit by maximum likelihood (Laplace Approximation) ['glmerMod']
Family: poisson ( log )
Formula: npf2 ~ week + (1 | cage2)
Data: data
```

| AIC  | BIC  | logLik | deviance | df.resid |
|------|------|--------|----------|----------|
| 95.3 | 98.1 | -43.7  | 87.3     | 11       |

```
Scaled residuals:
      Min       1Q   Median       3Q      Max
-1.30053 -0.29629  0.07708  0.27722  0.86257
```

```
Random effects:
 Groups Name      Variance Std.Dev.
cage2  (Intercept) 0.0077   0.08775
Number of obs: 15, groups: cage2, 5
```

```
Fixed effects:
              Estimate Std. Error z value Pr(>|z|)
(Intercept)   3.75270    0.07898  47.515  < 2e-16 ***
```

```

weekWeek 2  -0.29708      0.10465  -2.839  0.00453 **
weekWeek 3  -0.90006      0.12709  -7.082  1.42e-12 ***
---
Signif. codes:  0 '***' 0.001 '**' 0.01 '*' 0.05 '.' 0.1 ' ' 1

Correlation of Fixed Effects:
      (Intr) wekWk2
weekWeek 2 -0.565
weekWeek 3 -0.465  0.351
>
> overdisp_fun <- function(model) {
+   rdf <- df.residual(model)
+   rp <- residuals(model,type="pearson")
+   Pearson.chisq <- sum(rp^2)
+   prat <- Pearson.chisq/rdf
+   pval <- pchisq(Pearson.chisq, df=rdf, lower.tail=FALSE)
+   c(chisq=Pearson.chisq, rdf=rdf, ratio=prat ,p.val=pval)
+ }
> overdisp_fun(mod)          ###p=0.9480402 >0.05 (no overdispersion)
      chisq      rdf      ratio      p.val
4.6230540 11.0000000  0.4202776  0.9480402
>
>
> mod2 <- update(mod,~.-week)
> anova(mod,mod2)
Data: data
Models:
mod2: npf2 ~ (1 | cage2)
mod: npf2 ~ week + (1 | cage2)
      npar      AIC      BIC logLik deviance  Chisq Df Pr(>Chisq)
mod2     2 146.916 148.332 -71.458  142.916
mod      4  95.303  98.136 -43.652   87.303 55.612  2  8.394e-13 ***
---
Signif. codes:  0 '***' 0.001 '**' 0.01 '*' 0.05 '.' 0.1 ' ' 1
> library(multcomp)
Le chargement a nécessité le package : mvtnorm
Le chargement a nécessité le package : survival
Le chargement a nécessité le package : TH.data
Le chargement a nécessité le package : MASS

Attachement du package : 'TH.data'

The following object is masked from 'package:MASS':

    geyser

> summary(glht(mod,linfct = mcp(week="Tukey")))
```

Simultaneous Tests for General Linear Hypotheses

Multiple Comparisons of Means: Tukey Contrasts

```

Fit: glmer(formula = npf2 ~ week + (1 | cage2), data = data, family = poisson)

Linear Hypotheses:
              Estimate Std. Error z value Pr(>|z|)
Week 2 - Week 1 == 0  -0.2971      0.1047  -2.839  0.0123 *
Week 3 - Week 1 == 0  -0.9001      0.1271  -7.082  <0.001 ***

```

```

Week 3 - Week 2 == 0   -0.6030      0.1333   -4.524   <0.001 ***
---
Signif. codes:  0 '***' 0.001 '**' 0.01 '*' 0.05 '.' 0.1 ' ' 1
(Adjusted p values reported -- single-step method)

>
>
> #----- Plots -----#
>
> mean(npf2)
[1] 30.66667
> sd(npf2)/sqrt(nrow(data))
[1] 3.057647
>
> par(mfrow=c(1,2))
> boxplot(npf2~week,ylab="Number of eggs/female", xlab="Egg collection")
> (m<-tapply(npf2,week,mean))
Week 1 Week 2 Week 3
  42.8   31.8   17.4
> (se<-tapply(npf2,week,sd)/sqrt(table(week)))
Week 1 Week 2 Week 3
3.397058 1.772005 1.536229
> bar<-barplot(m,beside=T,las=1,cex.axis=0.8,ylab="Mean number of eggs/female (±se)", xlab="Egg collection",ylim=c(0,50))
> arrows(bar,m+se,bar,m-se,angle=90,code=3,length=0.05)
>
>
>
> ##### END
#####>

>
#####
#####
> ##### 2. Aedes albopictus egg hatching rate
#####
>
#####
#####

>
>
> #----- Loading the dataset -----#
>
> library(readr)
> data <- read_delim("~/statsmaiga/MRC optimization/Insect ms
DATA/data_resubm/aedes.egg.hatching.csv",
+                               ";", escape_double = FALSE, trim_ws =
TRUE)
Parsed with column specification:
cols(
  replicate = col_character(),
  cage = col_character(),
  cage2 = col_character(),
  week = col_character(),
  eggorigin = col_character(),
  eggsample = col_character(),
  hatched = col_double(),
  unhatched = col_double()
)

```

```

> View(data)
> str(data)
tibble [90 x 8] (S3: spec_tbl_df/tbl_df/tbl/data.frame)
 $ replicate: chr [1:90] "R1" "R1" "R1" "R1" ...
 $ cage      : chr [1:90] "C1" "C1" "C1" "C1" ...
 $ cage2     : chr [1:90] "C1" "C1" "C1" "C1" ...
 $ week      : chr [1:90] "Week 1" "Week 1" "Week 1" "Week 1" ...
 $ eggorigin : chr [1:90] "Paper" "Paper" "Paper" "Floating" ...
 $ eggsample : chr [1:90] "S1" "S2" "S3" "S1" ...
 $ hatched   : num [1:90] 94 89 92 81 92 91 93 92 88 84 ...
 $ unhatched : num [1:90] 6 11 8 19 8 10 9 8 12 16 ...
 - attr(*, "spec")=
 .. cols(
 ..   replicate = col_character(),
 ..   cage = col_character(),
 ..   cage2 = col_character(),
 ..   week = col_character(),
 ..   eggorigin = col_character(),
 ..   eggsample = col_character(),
 ..   hatched = col_double(),
 ..   unhatched = col_double()
 .. )
> data <- transform(data,
+                   replicate=factor(replicate),
+                   cage=factor(cage),
+                   cage2=factor(cage2),
+                   week=factor(week),
+                   eggorigin=factor(eggorigin),
+                   eggsample=factor(eggsample))
> str(data)
'data.frame':    90 obs. of  8 variables:
 $ replicate: Factor w/ 2 levels "R1","R2": 1 1 1 1 1 1 1 1 1 1 ...
 $ cage      : Factor w/ 3 levels "C1","C2","C3": 1 1 1 1 1 1 2 2 2 2 ...
 $ cage2     : Factor w/ 5 levels "C1","C2","C3",...: 1 1 1 1 1 1 2 2 2 2 ...
 $ week      : Factor w/ 3 levels "Week 1","Week 2",...: 1 1 1 1 1 1 1 1 1 1
 ...
 $ eggorigin : Factor w/ 2 levels "Floating","Paper": 2 2 2 1 1 1 2 2 2 1
 ...
 $ eggsample : Factor w/ 3 levels "S1","S2","S3": 1 2 3 1 2 3 1 2 3 1 ...
 $ hatched   : num  94 89 92 81 92 91 93 92 88 84 ...
 $ unhatched : num   6 11 8 19 8 10 9 8 12 16 ...
> summary(data)
 replicate cage   cage2      week      eggorigin eggsample   hatched
unhatched
 R1:54      C1:36   C1:18   Week 1:30   Floating:45   S1:30      Min.
:35.00    Min.      : 4.00
 R2:36      C2:36   C2:18   Week 2:30   Paper :45    S2:30      1st
Qu.:65.25    1st Qu.:16.00
          C3:18   C3:18   Week 3:30          S3:30      Median
:74.50    Median :25.50
          C4:18          Mean
:72.74    Mean   :27.46
          C5:18          3rd
Qu.:84.75    3rd Qu.:34.00
          Max.      :65.00
:96.00    Max.      :65.00
> attach(data)
>
>
> #----- Statistical analysis -----#
>

```

```

>
> y <- cbind(hatched, unhatched)
>
> library(lme4)
> mod <- glmer(y ~ week*eggorigin + (1|cage2), family = "binomial")
> summary(mod)
Generalized linear mixed model fit by maximum likelihood (Laplace
Approximation) ['glmerMod']
Family: binomial (logit)
Formula: y ~ week * eggorigin + (1 | cage2)

            AIC      BIC    logLik deviance df.resid
      823.4    840.9   -404.7    809.4      83

Scaled residuals:
      Min       1Q   Median       3Q      Max
-9.7001 -1.0019  0.0474  1.2987  3.3957

Random effects:
Groups Name      Variance Std.Dev.
cage2  (Intercept) 0.3158   0.5619
Number of obs: 90, groups: cage2, 5

Fixed effects:
              Estimate Std. Error z value Pr(>|z|)
(Intercept)    1.27618    0.25909   4.926 8.41e-07 ***
weekWeek 2     -0.61002    0.08419  -7.245 4.31e-13 ***
weekWeek 3     -0.45360    0.08501  -5.336 9.51e-08 ***
eggoriginPaper    0.46034    0.09489   4.851 1.23e-06 ***
weekWeek 2:eggoriginPaper -0.39714    0.12397  -3.204 0.00136 **
weekWeek 3:eggoriginPaper -0.07864    0.12698  -0.619 0.53573
---
Signif. codes:  0 '***' 0.001 '**' 0.01 '*' 0.05 '.' 0.1 ' ' 1

Correlation of Fixed Effects:
              (Intr) wekWk2 wekWk3 eggrgP wkW2:P
weekWeek 2   -0.181
weekWeek 3   -0.179  0.549
eggoriginPpr -0.159  0.490  0.485
wkW2:ggrgnP  0.122 -0.677 -0.371 -0.765
wkW3:ggrgnP  0.119 -0.367 -0.669 -0.747  0.572
>
> overdisp_fun <- function(model) {
+   rdf <- df.residual(model)
+   rp <- residuals(model,type="pearson")
+   Pearson.chisq <- sum(rp^2)
+   prat <- Pearson.chisq/rdf
+   pval <- pchisq(Pearson.chisq, df=rdf, lower.tail=FALSE)
+   c(chisq=Pearson.chisq, rdf=rdf, ratio=prat ,p.val=pval)
+ }
> overdisp_fun(mod)
      chisq      rdf      ratio      p.val
3.836899e+02 8.300000e+01 4.622770e+00 3.371308e-40
>
> data$obs<- 1:nrow(data)
> str(data)
'data.frame':   90 obs. of  9 variables:
 $ replicate: Factor w/ 2 levels "R1","R2": 1 1 1 1 1 1 1 1 1 1 ...
 $ cage      : Factor w/ 3 levels "C1","C2","C3": 1 1 1 1 1 1 2 2 2 2 ...
 $ cage2     : Factor w/ 5 levels "C1","C2","C3",...: 1 1 1 1 1 1 2 2 2 2 ...

```

```

$ week      : Factor w/ 3 levels "Week 1","Week 2",...: 1 1 1 1 1 1 1 1 1 1 1
...
$ eggorigin: Factor w/ 2 levels "Floating","Paper": 2 2 2 1 1 1 2 2 2 1
...
$ eggsample: Factor w/ 3 levels "S1","S2","S3": 1 2 3 1 2 3 1 2 3 1 ...
$ hatched   : num  94 89 92 81 92 91 93 92 88 84 ...
$ unhatched : num   6 11  8 19  8 10  9  8 12 16 ...
$ obs       : int   1  2  3  4  5  6  7  8  9 10 ...
> mod <- glmer(y ~ week*eggorigin + (1|cage2) + (1|obs), data=data, family
= "binomial")
> summary(mod)
Generalized linear mixed model fit by maximum likelihood (Laplace
Approximation) ['glmerMod']
Family: binomial (logit)
Formula: y ~ week * eggorigin + (1 | cage2) + (1 | obs)
Data: data

            AIC      BIC    logLik deviance df.resid
        664.4      684.4    -324.2    648.4        82

Scaled residuals:
      Min       1Q   Median       3Q      Max
-1.65296 -0.27143 -0.01174  0.36409  1.19061

Random effects:
Groups Name      Variance Std.Dev.
obs      (Intercept) 0.1827   0.4274
cage2    (Intercept) 0.3363   0.5799
Number of obs: 90, groups:  obs, 90; cage2, 5

Fixed effects:
              Estimate Std. Error z value Pr(>|z|)
(Intercept)      1.3471    0.2899   4.647 3.37e-06 ***
weekWeek 2      -0.6574    0.1797  -3.658 0.000254 ***
weekWeek 3      -0.4698    0.1807  -2.601 0.009303 **
eggoriginPaper    0.4867    0.1874   2.598 0.009390 **
weekWeek 2:eggoriginPaper -0.4133    0.2574  -1.605 0.108431
weekWeek 3:eggoriginPaper -0.1779    0.2590  -0.687 0.492164
---
Signif. codes:  0 '***' 0.001 '**' 0.01 '*' 0.05 '.' 0.1 ' ' 1

Correlation of Fixed Effects:
              (Intr) wekWk2 wekWk3 eggrgP wkW2:P
weekWeek 2   -0.322
weekWeek 3   -0.320  0.516
eggoriginPpr -0.308  0.496  0.494
wkW2:ggrgP   0.224 -0.697 -0.360 -0.728
wkW3:ggrgP   0.222 -0.359 -0.697 -0.724  0.526
>
> mod2 <- update(mod, ~.-week:eggorigin)
> anova(mod, mod2)
Data: data
Models:
mod2: y ~ week + eggorigin + (1 | cage2) + (1 | obs)
mod: y ~ week * eggorigin + (1 | cage2) + (1 | obs)
      npar      AIC      BIC    logLik deviance  Chisq Df Pr(>Chisq)
mod2     6 662.93 677.93 -325.47    650.93
mod      8 664.36 684.36 -324.18    648.36 2.5688  2    0.2768

```

( $P > 0.05$ , meaning that the week\*eggorigin interaction does not explain the variability in egg hatch) and so the model without the interaction (mod2) is better than mod based also on the AIC)

```
> summary(mod2)
Generalized linear mixed model fit by maximum likelihood (Laplace
Approximation) ['glmerMod']
Family: binomial ( logit )
Formula: y ~ week + eggorigin + (1 | cage2) + (1 | obs)
Data: data
```

| AIC   | BIC   | logLik | deviance | df.resid |
|-------|-------|--------|----------|----------|
| 662.9 | 677.9 | -325.5 | 650.9    | 84       |

```
Scaled residuals:
    Min      1Q   Median      3Q      Max
-1.69115 -0.25583  0.00771  0.31760  1.12212
```

```
Random effects:
Groups Name      Variance Std.Dev.
obs      (Intercept) 0.1900  0.4359
cage2    (Intercept) 0.3358  0.5795
Number of obs: 90, groups:  obs, 90; cage2, 5
```

```
Fixed effects:
              Estimate Std. Error z value Pr(>|z|)
(Intercept)    1.4463    0.2807   5.152 2.58e-07 ***
weekWeek 2     -0.8601    0.1307  -6.582 4.65e-11 ***
weekWeek 3     -0.5552    0.1314  -4.225 2.39e-05 ***
eggoriginPaper  0.2819    0.1059   2.662 0.00777 **
---
Signif. codes:  0 '***' 0.001 '**' 0.01 '*' 0.05 '.' 0.1 ' ' 1
```

```
Correlation of Fixed Effects:
              (Intr) wekWk2 wekWk3
weekWeek 2   -0.244
weekWeek 3   -0.243  0.526
eggoriginPpr -0.181 -0.014 -0.014
```

```
>
> mod3 <- update(mod2, ~.-eggorigin)
> anova(mod2, mod3)
Data: data
Models:
mod3: y ~ week + (1 | cage2) + (1 | obs)
mod2: y ~ week + eggorigin + (1 | cage2) + (1 | obs)
      npar    AIC    BIC logLik deviance Chisq Df Pr(>Chisq)
mod3     5 667.75 680.25 -328.87   657.75
mod2     6 662.93 677.93 -325.47   650.93 6.8162  1  0.009033 **
---
Signif. codes:  0 '***' 0.001 '**' 0.01 '*' 0.05 '.' 0.1 ' ' 1
>
```

```
> mod4 <- update(mod2, ~.-week)
> anova(mod2, mod4)
Data: data
Models:
mod4: y ~ eggorigin + (1 | cage2) + (1 | obs)
mod2: y ~ week + eggorigin + (1 | cage2) + (1 | obs)
      npar    AIC    BIC logLik deviance Chisq Df Pr(>Chisq)
mod4     4 695.46 705.46 -343.73   687.46
mod2     6 662.93 677.93 -325.47   650.93 36.528  2  1.17e-08 ***
---
```



```

Signif. codes:  0 '***' 0.001 '**' 0.01 '*' 0.05 '.' 0.1 ' ' 1
>
> library(multcomp)
> summary(glht(mod2,linfct = mcp(week="Tukey"))))

```

### Simultaneous Tests for General Linear Hypotheses

Multiple Comparisons of Means: Tukey Contrasts

```

Fit: glmer(formula = y ~ week + eggorigin + (1 | cage2) + (1 | obs),
  data = data, family = "binomial")

```

Linear Hypotheses:

|                      | Estimate | Std. Error | z value | Pr(> z )   |
|----------------------|----------|------------|---------|------------|
| Week 2 - Week 1 == 0 | -0.8601  | 0.1307     | -6.582  | <0.001 *** |
| Week 3 - Week 1 == 0 | -0.5552  | 0.1314     | -4.225  | <0.001 *** |
| Week 3 - Week 2 == 0 | 0.3049   | 0.1276     | 2.389   | 0.0445 *   |

---

```

Signif. codes:  0 '***' 0.001 '**' 0.01 '*' 0.05 '.' 0.1 ' ' 1
(Adjusted p values reported -- single-step method)

```

```

> library(emmeans)
> summary(emmeans(mod2,pairwise~week), infer=TRUE, type="response")
$emmeans

```

| week   | prob  | SE     | df  | asyp.LCL | asyp.UCL | z.ratio | p.value |
|--------|-------|--------|-----|----------|----------|---------|---------|
| Week 1 | 0.830 | 0.0389 | Inf | 0.740    | 0.894    | 5.749   | <.0001  |
| Week 2 | 0.674 | 0.0602 | Inf | 0.547    | 0.780    | 2.652   | 0.0080  |
| Week 3 | 0.737 | 0.0532 | Inf | 0.621    | 0.828    | 3.758   | 0.0002  |

Results are averaged over the levels of: eggorigin

Confidence level used: 0.95

Intervals are back-transformed from the logit scale

Tests are performed on the logit scale

\$contrasts

| contrast        | odds.ratio | SE     | df  | asyp.LCL | asyp.UCL | z.ratio | p.value |
|-----------------|------------|--------|-----|----------|----------|---------|---------|
| Week 1 / Week 2 | 2.363      | 0.3089 | Inf | 1.740    | 3.210    | 6.582   | <.0001  |
| Week 1 / Week 3 | 1.742      | 0.2289 | Inf | 1.280    | 2.371    | 4.225   | 0.0001  |
| Week 2 / Week 3 | 0.737      | 0.0941 | Inf | 0.547    | 0.994    | -2.389  | 0.0445  |

Results are averaged over the levels of: eggorigin

Confidence level used: 0.95

Conf-level adjustment: tukey method for comparing a family of 3 estimates

Intervals are back-transformed from the log odds ratio scale

P value adjustment: tukey method for comparing a family of 3 estimates

Tests are performed on the log odds ratio scale

```

> summary(emmeans(mod2,pairwise~eggorigin), infer=TRUE, type="response")
$emmeans

```

| eggorigin | prob  | SE     | df  | asyp.LCL | asyp.UCL | z.ratio | p.value |
|-----------|-------|--------|-----|----------|----------|---------|---------|
| Floating  | 0.726 | 0.0536 | Inf | 0.610    | 0.818    | 3.615   | 0.0003  |
| Paper     | 0.778 | 0.0466 | Inf | 0.674    | 0.856    | 4.654   | <.0001  |

Results are averaged over the levels of: week

Confidence level used: 0.95

Intervals are back-transformed from the logit scale

Tests are performed on the logit scale

\$contrasts

| contrast | odds.ratio | SE | df | asyp.LCL | asyp.UCL | z.ratio | p.value |
|----------|------------|----|----|----------|----------|---------|---------|
|----------|------------|----|----|----------|----------|---------|---------|

|                  |       |        |     |       |       |        |        |
|------------------|-------|--------|-----|-------|-------|--------|--------|
| Floating / Paper | 0.754 | 0.0799 | Inf | 0.613 | 0.928 | -2.662 | 0.0078 |
|------------------|-------|--------|-----|-------|-------|--------|--------|

Results are averaged over the levels of: week

Confidence level used: 0.95

Intervals are back-transformed from the log odds ratio scale

Tests are performed on the log odds ratio scale

```
>
>
> #----- Plots -----#
>
> (prop<-sum(hatched)/sum(hatched+unhatched))
[1] 0.7259925
> (IC<-1.96*sqrt(prop*(1-prop)/nrow(data)))
[1] 0.0921472
>
> par(mfrow=c(1,2))
> (p<-tapply(hatched,week,sum)/tapply(hatched+unhatched,week,sum))
  Week 1    Week 2    Week 3
0.8011948 0.6575616 0.7189477
> (IC<-1.96*sqrt(p*(1-p)/tapply(hatched+unhatched,week,sum)))
  Week 1    Week 2    Week 3
0.01425081 0.01697502 0.01607758
> bar<-barplot(p,beside=T,las=1,cex.axis=0.8,ylab="Egg hatch rate
(±95%CI)",
+             xlab="Egg collection", ylim=c(0,1), cex.names=0.9,cex.lab=1)
> arrows(bar,p+IC,bar,p-IC,angle=90,code=3,length=0.05)
>
> (p<-
tapply(hatched,eggorigin,sum)/tapply(hatched+unhatched,eggorigin,sum))
  Floating    Paper
0.7001330 0.7518864
> (IC<-1.96*sqrt(p*(1-p)/tapply(hatched+unhatched,eggorigin,sum)))
  Floating    Paper
0.01336984 0.01261136
> bar<-barplot(p,beside=T,las=1,cex.axis=0.8,ylab="Egg hatch rate
(±95%CI)",
+             xlab="Egg origin", ylim=c(0,1), cex.names=0.9,cex.lab=1)
> arrows(bar,p+IC,bar,p-IC,angle=90,code=3,length=0.05)
>
>
> > #Full model and odds ratio calculation
> mod <- glmer(y ~ week*eggorigin + (1|cage2) + (1|obs), data=data, family
= "binomial")
> summary(mod)
```

Generalized linear mixed model fit by maximum likelihood (Laplace Approximation) [glmerMod]

Family: binomial (logit)

Formula: y ~ week \* eggorigin + (1 | cage2) + (1 | obs)

Data: data

|       |       |        |          |          |
|-------|-------|--------|----------|----------|
| AIC   | BIC   | logLik | deviance | df.resid |
| 664.4 | 684.4 | -324.2 | 648.4    | 82       |

Scaled residuals:

|          |          |          |         |         |
|----------|----------|----------|---------|---------|
| Min      | 1Q       | Median   | 3Q      | Max     |
| -1.65296 | -0.27143 | -0.01174 | 0.36409 | 1.19061 |

Random effects:

```

Groups Name      Variance Std.Dev.
obs      (Intercept) 0.1827  0.4274
cage2    (Intercept) 0.3363  0.5799
Number of obs: 90, groups:  obs, 90; cage2, 5

```

Fixed effects:

```

              Estimate Std. Error z value Pr(>|z|)
(Intercept)      1.3471     0.2899   4.647 3.37e-06 ***
weekWeek 2       -0.6574     0.1797  -3.658 0.000254 ***
weekWeek 3       -0.4698     0.1807  -2.601 0.009303 **
eggoriginPaper    0.4867     0.1874   2.598 0.009390 **
weekWeek 2:eggoriginPaper -0.4133     0.2574  -1.605 0.108431
weekWeek 3:eggoriginPaper -0.1779     0.2590  -0.687 0.492164
---

```

Signif. codes: 0 '\*\*\*' 0.001 '\*\*' 0.01 '\*' 0.05 '.' 0.1 ' ' 1

Correlation of Fixed Effects:

```

              (Intr) wekWk2 wekWk3 eggrgP wkW2:P
weekWeek 2   -0.322
weekWeek 3   -0.320  0.516
eggoriginPpr -0.308  0.496  0.494
wkW2:ggrgnP  0.224 -0.697 -0.360 -0.728
wkW3:ggrgnP  0.222 -0.359 -0.697 -0.724  0.526

```

> # OR

```
> exp(cbind(OR=fixef(mod)))
```

```

              OR
(Intercept)      3.8464423
weekWeek 2       0.5181827
weekWeek 3       0.6251050
eggoriginPaper    1.6268830
weekWeek 2:eggoriginPaper 0.6614930
weekWeek 3:eggoriginPaper 0.8370039

```

> #95% CI

```
> exp(confint(mod, metho="Wald"))
```

```

              2.5 %      97.5 %
.sig01              NA        NA
.sig02              NA        NA
(Intercept)      2.1791154  6.7895066
weekWeek 2       0.3643333  0.7369990
weekWeek 3       0.4387107  0.8906924
eggoriginPaper    1.1268761  2.3487484
weekWeek 2:eggoriginPaper 0.3993896  1.0956042
weekWeek 3:eggoriginPaper 0.5037707  1.3906634

```

>

```
#####
#####

```

```
> ##### 3. Aedes albopictus egg floating rate
```

```
#####
#####

```

>

>

```
> #-----dataset -----#
```

```
> library(readr)
```

```
> data <- read_delim("~/statsmaiga/MRC optimization/Insect ms
```

```
DATA/data_resubm/aedes.egg.floating.csv",
```

```
+                                ";", escape_double = FALSE, trim_ws =
TRUE)
```

Parsed with column specification:

```
cols(
```

```
  replicate = col_character(),
```

```
  cage = col_character(),
```

```

    cage2 = col_character(),
    week = col_character(),
    number = col_double(),
    floating = col_double(),
    paper = col_double()
)
> View(data)
> str(data)
tibble [15 x 7] (S3: spec_tbl_df/tbl_df/tbl/data.frame)
 $ replicate: chr [1:15] "R1" "R1" "R1" "R1" ...
 $ cage      : chr [1:15] "C1" "C2" "C3" "C1" ...
 $ cage2     : chr [1:15] "C1" "C2" "C3" "C1" ...
 $ week      : chr [1:15] "Week 1" "Week 1" "Week 1" "Week 2" ...
 $ number    : num [1:15] 662149 606178 643564 413393 439849 ...
 $ floating  : num [1:15] 25796 20853 20354 20325 19139 ...
 $ paper     : num [1:15] 636353 585325 623211 393068 420711 ...
 - attr(*, "spec")=
   .. cols(
   ..   replicate = col_character(),
   ..   cage = col_character(),
   ..   cage2 = col_character(),
   ..   week = col_character(),
   ..   number = col_double(),
   ..   floating = col_double(),
   ..   paper = col_double()
   .. )
> data <- transform(data,
+                   replicate=factor(replicate),
+                   cage=factor(cage),
+                   cage2=factor(cage2),
+                   week=factor(week))
> str(data)
'data.frame':    15 obs. of  7 variables:
 $ replicate: Factor w/ 2 levels "R1","R2": 1 1 1 1 1 1 1 1 1 2 ...
 $ cage      : Factor w/ 3 levels "C1","C2","C3": 1 2 3 1 2 3 1 2 3 1 ...
 $ cage2     : Factor w/ 5 levels "C1","C2","C3",...: 1 2 3 1 2 3 1 2 3 4 ...
 $ week      : Factor w/ 3 levels "Week 1","Week 2",...: 1 1 1 2 2 2 3 3 3 1
 ...
 $ number    : num  662149 606178 643564 413393 439849 ...
 $ floating  : num  25796 20853 20354 20325 19139 ...
 $ paper     : num  636353 585325 623211 393068 420711 ...
> summary(data)
  replicate cage  cage2    week    number    floating
paper
 R1:9      C1:6   C1:3   Week 1:5   Min.    :189282   Min.    : 6198   Min.
:183084
 R2:6      C2:6   C2:3   Week 2:5   1st Qu.:275896   1st Qu.:11404   1st
Qu.:262934
          C3:3   C3:3   Week 3:5   Median :413393   Median :19139   Median
:391225
          C4:3                   Mean  :411882   Mean   :16627   Mean
:395255
          C5:3                   3rd Qu.:525442   3rd Qu.:20604   3rd
Qu.:502132
                   Max.    :662149   Max.    :26482   Max.
:636353
> attach(data)
The following objects are masked from data (pos = 3):
    cage, week

```

The following object is masked from data (pos = 6):

cage

The following objects are masked from data (pos = 7):

cage, cage2, replicate, week

```
> y <- cbind(floating,paper)
> library(lme4)
> mod <- glmer(y ~ week + (1|cage2),family=binomial)
> summary(mod)
Generalized linear mixed model fit by maximum likelihood (Laplace
Approximation) ['glmerMod']
Family: binomial (logit)
Formula: y ~ week + (1 | cage2)
```

| AIC    | BIC    | logLik  | deviance | df.resid |
|--------|--------|---------|----------|----------|
| 8148.6 | 8151.4 | -4070.3 | 8140.6   | 11       |

Scaled residuals:

| Min     | 1Q      | Median | 3Q     | Max    |
|---------|---------|--------|--------|--------|
| -30.819 | -18.321 | -6.241 | 22.532 | 37.528 |

Random effects:

| Groups Name       | Variance | Std.Dev. |
|-------------------|----------|----------|
| cage2 (Intercept) | 0.00226  | 0.04754  |

Number of obs: 15, groups: cage2, 5

Fixed effects:

|             | Estimate  | Std. Error | z value  | Pr(> z )     |
|-------------|-----------|------------|----------|--------------|
| (Intercept) | -3.163109 | 0.021475   | -147.295 | < 2e-16 ***  |
| weekWeek 2  | -0.027547 | 0.004628   | -5.953   | 2.64e-09 *** |
| weekWeek 3  | 0.033595  | 0.005499   | 6.109    | 1.00e-09 *** |

---

Signif. codes: 0 '\*\*\*' 0.001 '\*\*' 0.01 '\*' 0.05 '.' 0.1 ' ' 1

Correlation of Fixed Effects:

(Intr) wekWk2

weekWeek 2 -0.091

weekWeek 3 -0.076 0.354

```
> overdisp_fun <- function(model) {
+   rdf <- df.residual(model)
+   rp <- residuals(model,type="pearson")
+   Pearson.chisq <- sum(rp^2)
+   prat <- Pearson.chisq/rdf
+   pval <- pchisq(Pearson.chisq, df=rdf, lower.tail=FALSE)
+   c(chisq=Pearson.chisq, rdf=rdf, ratio=prat ,p.val=pval)
+ }
```

```
> overdisp_fun(mod)
      chisq      rdf      ratio      p.val
8027.3343  11.0000  729.7577   0.0000
```

```
> data$obs<- 1:nrow(data)
```

```
> str(data)
```

'data.frame': 15 obs. of 8 variables:

```
$ replicate: Factor w/ 2 levels "R1","R2": 1 1 1 1 1 1 1 1 1 2 ...
$ cage      : Factor w/ 3 levels "C1","C2","C3": 1 2 3 1 2 3 1 2 3 1 ...
$ cage2     : Factor w/ 5 levels "C1","C2","C3",...: 1 2 3 1 2 3 1 2 3 4 ...
$ week      : Factor w/ 3 levels "Week 1","Week 2",...: 1 1 1 2 2 2 3 3 3 1
...
$ number    : num 662149 606178 643564 413393 439849 ...
```

```

$ floating : num  25796 20853 20354 20325 19139 ...
$ paper    : num  636353 585325 623211 393068 420711 ...
$ obs      : int   1 2 3 4 5 6 7 8 9 10 ...
> mod <- glmer(y ~ week + (1|cage2) + (1|obs), data=data, family =
"binomial")
boundary (singular) fit: see ?isSingular
> summary(mod)
Generalized linear mixed model fit by maximum likelihood (Laplace
Approximation) ['glmerMod']
Family: binomial ( logit )
Formula: y ~ week + (1 | cage2) + (1 | obs)
Data: data

            AIC      BIC    logLik deviance df.resid
      289.7      293.2   -139.8    279.7        10

Scaled residuals:
      Min       1Q   Median       3Q      Max
-0.082513 -0.044417 -0.006606  0.031007  0.063308

Random effects:
Groups Name      Variance Std.Dev.
obs      (Intercept) 0.03412  0.1847
cage2    (Intercept) 0.00000  0.0000
Number of obs: 15, groups:  obs, 15; cage2, 5

Fixed effects:
              Estimate Std. Error z value Pr(>|z|)
(Intercept) -3.15604     0.08267 -38.178  <2e-16 ***
weekWeek 2  -0.05903     0.11693  -0.505    0.614
weekWeek 3  -0.01050     0.11697  -0.090    0.928
---
Signif. codes:  0 '***' 0.001 '**' 0.01 '*' 0.05 '.' 0.1 ' ' 1

Correlation of Fixed Effects:
              (Intr) wekWk2
weekWeek 2  -0.707
weekWeek 3  -0.707  0.500
convergence code: 0
boundary (singular) fit: see ?isSingular

> mod2 <- update(mod, ~.-week)
boundary (singular) fit: see ?isSingular
> anova(mod, mod2)
Data: data
Models:
mod2: y ~ (1 | cage2) + (1 | obs)
mod: y ~ week + (1 | cage2) + (1 | obs)
      npar    AIC    BIC  logLik deviance  Chisq Df Pr(>Chisq)
mod2     3 285.94 288.07 -139.97   279.94
mod      5 289.66 293.20 -139.83   279.66 0.2872  2    0.8662
> (prop<-sum(floating)/sum(floating+paper))
[1] 0.04036944
> (IC<-1.96*sqrt(prop*(1-prop)/sum(floating+paper)))
[1] 0.0001552037
> (p<-tapply(floating, week, sum)/tapply(floating+paper, week, sum))
      Week 1      Week 2      Week 3
0.04049197 0.03941335 0.04180587
> (IC<-1.96*sqrt(p*(1-p)/tapply(floating+paper, week, sum)))
      Week 1      Week 2      Week 3
0.0002281891 0.0002609939 0.0003616407

```

```

> bar<-barplot(p,beside=T,las=1,cex.axis=0.8,ylab="Egg floating rate
(±95%CI)",
+             xlab="Egg collection", ylim=c(0,1), cex.names=0.9,cex.lab=1)
> arrows(bar,p+IC,bar,p-IC,angle=90,code=3,length=0.05)
>
> ##### END
#####
> #####
> ### 4. Aedes adult mortality rate #####
> #####
#####
#####
>
>
> #----- Loading the dataset -----#
> library(readr)
> data <- read_delim("~/statsmaiga/MRC optimization/Insect ms
DATA/data_resubm/aedes.daily.mortality.csv",
+                  ";", escape_double = FALSE, trim_ws =
TRUE)
Parsed with column specification:
cols(
  cage = col_character(),
  square = col_double(),
  sex = col_character(),
  dailymortality = col_double()
)
> View(data)
> str(data)
tibble [36 x 4] (S3: spec_tbl_df/tbl_df/tbl/data.frame)
 $ cage      : chr [1:36] "C1" "C1" "C1" "C1" ...
 $ square     : num [1:36] 1 2 3 4 5 6 1 2 3 4 ...
 $ sex        : chr [1:36] "Male" "Male" "Male" "Male" ...
 $ dailymortality: num [1:36] 0.058 0.0697 0.1524 0.1131 0.1039 ...
- attr(*, "spec")=
.. cols(
..   cage = col_character(),
..   square = col_double(),
..   sex = col_character(),
..   dailymortality = col_double()
.. )
> data$cage <- as.factor(data$cage)
> data$square <- as.factor(data$square)
> data$sex <- as.factor(data$sex)
> str(data)
tibble [36 x 4] (S3: spec_tbl_df/tbl_df/tbl/data.frame)
 $ cage      : Factor w/ 3 levels "C1","C2","C3": 1 1 1 1 1 1 1 1 1 1
...
 $ square     : Factor w/ 6 levels "1","2","3","4",...: 1 2 3 4 5 6 1 2 3
4 ...
 $ sex        : Factor w/ 2 levels "Female","Male": 2 2 2 2 2 2 1 1 1 1
...
 $ dailymortality: num [1:36] 0.058 0.0697 0.1524 0.1131 0.1039 ...
- attr(*, "spec")=
.. cols(
..   cage = col_character(),
..   square = col_double(),
..   sex = col_character(),
..   dailymortality = col_double()

```

```

.. )
> summary (data)
  cage      square      sex      dailymortality
C1:12    1:6      Female:18    Min.       :0.05795
C2:12    2:6      Male  :18    1st Qu.:0.10358
C3:12    3:6                      Median :0.11343
      4:6                      Mean   :0.11456
      5:6                      3rd Qu.:0.12875
      6:6                      Max.   :0.15718
> attach(data)
The following object is masked from data (pos = 3):

```

cage

```

> library(lme4)
> mod <- lmer(dailymortality ~ sex + (1|cage))
> summary(mod)
Linear mixed model fit by REML ['lmerMod']
Formula: dailymortality ~ sex + (1 | cage)

```

REML criterion at convergence: -154.6

Scaled residuals:

|  | Min      | 1Q       | Median   | 3Q      | Max     |
|--|----------|----------|----------|---------|---------|
|  | -2.39150 | -0.44717 | -0.00462 | 0.67424 | 1.85751 |

Random effects:

| Groups   | Name        | Variance  | Std.Dev. |
|----------|-------------|-----------|----------|
| cage     | (Intercept) | 9.113e-06 | 0.003019 |
| Residual |             | 5.180e-04 | 0.022760 |

Number of obs: 36, groups: cage, 3

Fixed effects:

|             | Estimate  | Std. Error | t value |
|-------------|-----------|------------|---------|
| (Intercept) | 0.115449  | 0.005641   | 20.468  |
| sexMale     | -0.001781 | 0.007587   | -0.235  |

Correlation of Fixed Effects:

```

(Intr)
sexMale -0.673
> par(mfrow=c(2,2))
> hist(resid(mod),freq=FALSE, ylim = c())
> lines(density(resid(mod)), col="red")
> library(car)
Le chargement a nécessité le package : carData
Registered S3 methods overwritten by 'car':
  method                                from
  influence.merMod                      lme4
  cooks.distance.influence.merMod      lme4
  dfbeta.influence.merMod              lme4
  dfbetas.influence.merMod            lme4
> qqPlot(resid(mod)) # good for normality
[1] 1 2
> plot(fitted(mod),resid(mod))
> abline(h=0) # good for variance

```



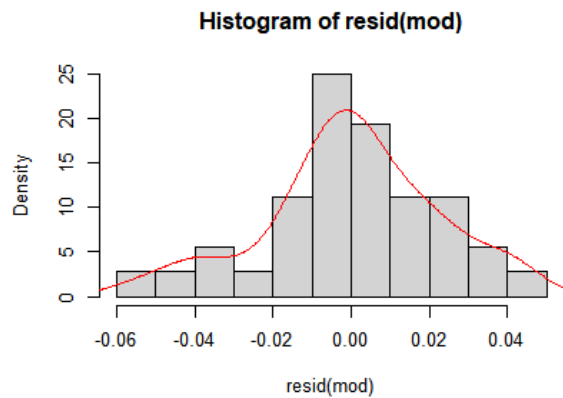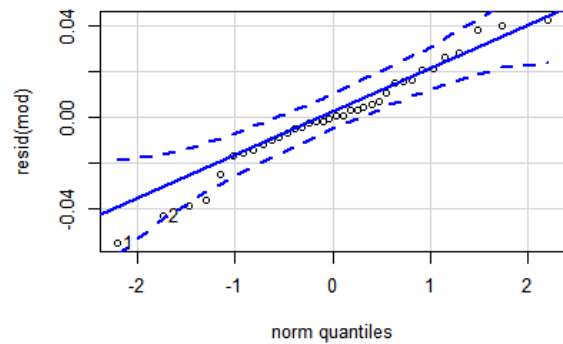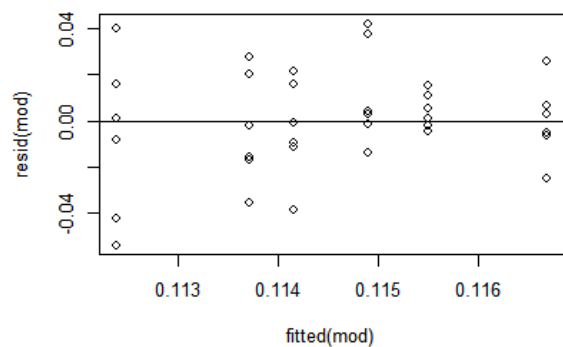

```
> shapiro.test(resid(mod))      # p-value = 0.5383  good for normality
```

Shapiro-Wilk normality test

```
data:  resid(mod)
W = 0.97381, p-value = 0.5383
```

```
> mod2 <- update(mod, ~.-sex)
> anova(mod, mod2)
refitting model(s) with ML (instead of REML)
Data: NULL
Models:
mod2: dailymortality ~ (1 | cage)
mod:  dailymortality ~ sex + (1 | cage)
      npar      AIC      BIC logLik deviance  Chisq Df Pr(>Chisq)
mod2    3 -165.75 -161.00 85.876  -171.75
mod     4 -163.81 -157.47 85.904  -171.81 0.0576  1      0.8103>>
```

```
#####  
#####  
##### 5. Anopheles arabiensis egg production  
#####  
#####  
#####
```

```
#----- Loading the dataset -----#
```

```
library(readr)  
data <- read_delim("~/statsmaiga/MRC optimization/Insect ms  
DATA/data_resubm/anopheles.egg.production.csv",  
                  ";", escape_double = FALSE, trim_ws  
= TRUE)  
View(data)  
  
str(data)  
data <- transform(data,  
                  cage=factor(cage),  
                  week=factor(week),  
                  eggbatch=factor(eggbatch),  
                  cagetype=factor(cagetype))  
  
str(data)  
summary (data)  
attach(data)  
  
library(lme4)  
mod <- lmer(npf2 ~ cagetype*eggbatch + (1|cage))  
summary(mod)  
  
par(mfrow=c(2,2))  
hist(resid(mod),freq=FALSE, ylim = c(0,0.3))  
lines(density(resid(mod)), col="red")  
library(car)  
qqPlot(resid(mod))  
plot(fitted(mod), resid(mod))  
abline(h=0)
```

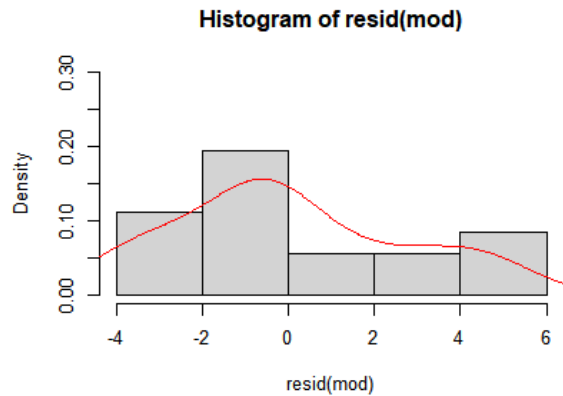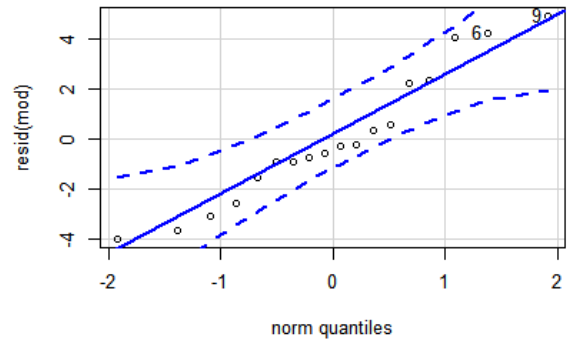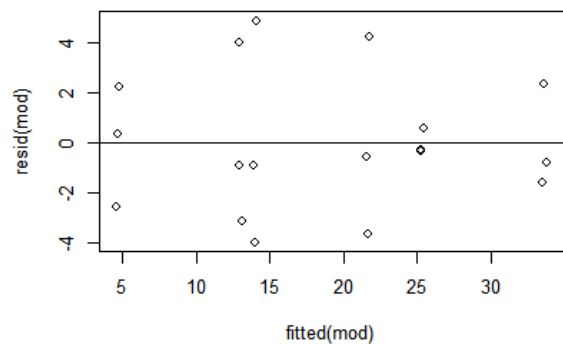

```
shapiro.test(resid(mod))      # p-value = 0.3534  # good

mod <- glmer(npf2 ~ cagetype*eggbatch + (1|cage), family=poisson)
summary(mod)

overdisp_fun <- function(model) {
  rdf <- df.residual(model)
  rp <- residuals(model,type="pearson")
  Pearson.chisq <- sum(rp^2)
  pratt <- Pearson.chisq/rdf
  pval <- pchisq(Pearson.chisq, df=rdf, lower.tail=FALSE)
  c(chisq=Pearson.chisq, rdf=rdf, ratio=pratt ,p.val=pval)
}
overdisp_fun(mod)

#----- Statistical analysis -----#

mod2 <- update(mod,~.-cagetype:eggbatch)
anova(mod,mod2)
library(car)
Anova(mod,Type=III)

library(multcomp)
summary(glht(mod,linfct = mcp(eggbatch="Tukey"))))
library(emmeans)
summary(emmeans(mod,pairwise~cagetype|eggbatch),infer=TRUE,
type="response")

#----- Plots -----#
```

```

mean(neggs)
sd(neggs)/sqrt(nrow(data))

par(mfrow=c(1,2))
boxplot(npf2 ~ cage type, ylab="Number of eggs/female", xlab="Cage type")

(m<-tapply(npf2,cage type,mean))
(se<-tapply(npf2,cage type,sd)/sqrt(table(cage type)))
bar<-barplot(m,beside=T,las=1,cex.axis=0.8,ylab="Mean number of eggs
/female (±se)", xlab="Cage type",ylim=c(0,35))
arrows(bar,m+se,bar,m-se,angle=90,code=3,length=0.05)

boxplot(npf2 ~ eggbatch, ylab="Number of eggs/female", xlab="Egg batch")
(m<-tapply(npf2,eggbatch,mean))
(se<-tapply(npf2,eggbatch,sd)/sqrt(table(eggbatch)))
bar<-barplot(m,beside=T,las=1,cex.axis=0.8,ylab="Mean number of eggs/female
(±se)", xlab="Egg collection",ylim=c(0,35))
arrows(bar,m+se,bar,m-se,angle=90,code=3,length=0.05)

boxplot(npf2~cage type:eggbatch, sep = "_", lex.order = TRUE, col =
c("gray25", "gray70","gray90"),ylab="Number of eggs produced by female",
xlab="Egg batch")
(m<-tapply(npf2,list(eggbatch,cage type),mean))
(se<-
tapply(npf2,list(eggbatch,cage type),sd)/sqrt(table(eggbatch,cage type)))
bar<-barplot(m,beside=T,las=1,cex.axis=0.8,ylab="Mean number of eggs/female
(±se)", xlab=" Egg collection x cage type interaction",ylim=c(0,35))
arrows(bar,m+se,bar,m-se,angle=90,code=3,length=0.05)
legend(6.6,38,levels(eggbatch), fill=c("gray25", "gray70","gray90"),xpd =
T)

(m<-tapply(npf2,list(cage type,eggbatch),mean))
(se<-
tapply(npf2,list(cage type,eggbatch),sd)/sqrt(table(cage type,eggbatch)))
bar<-barplot(m,beside=T,las=1,cex.axis=0.8,ylab="Mean number of eggs/female
(±se)", xlab=" Egg collection : cage type interaction",ylim=c(0,35))
arrows(bar,m+se,bar,m-se,angle=90,code=3,length=0.05)
legend(6.6,38,levels(cage type), fill=c("gray25", "gray70","gray90"),xpd =
T)

##### END
#####
#####

```
