# Supplementary material for: Assessment of a Novel Adult Mass-Rearing Cage for Aedes albopictus (Skuse) and Anopheles arabiensis (Patton)
Source: MDPI journal article supplement (doi:10.3390/insects11110801), 2020-11-13
Supplement: s1 [file s1]

1

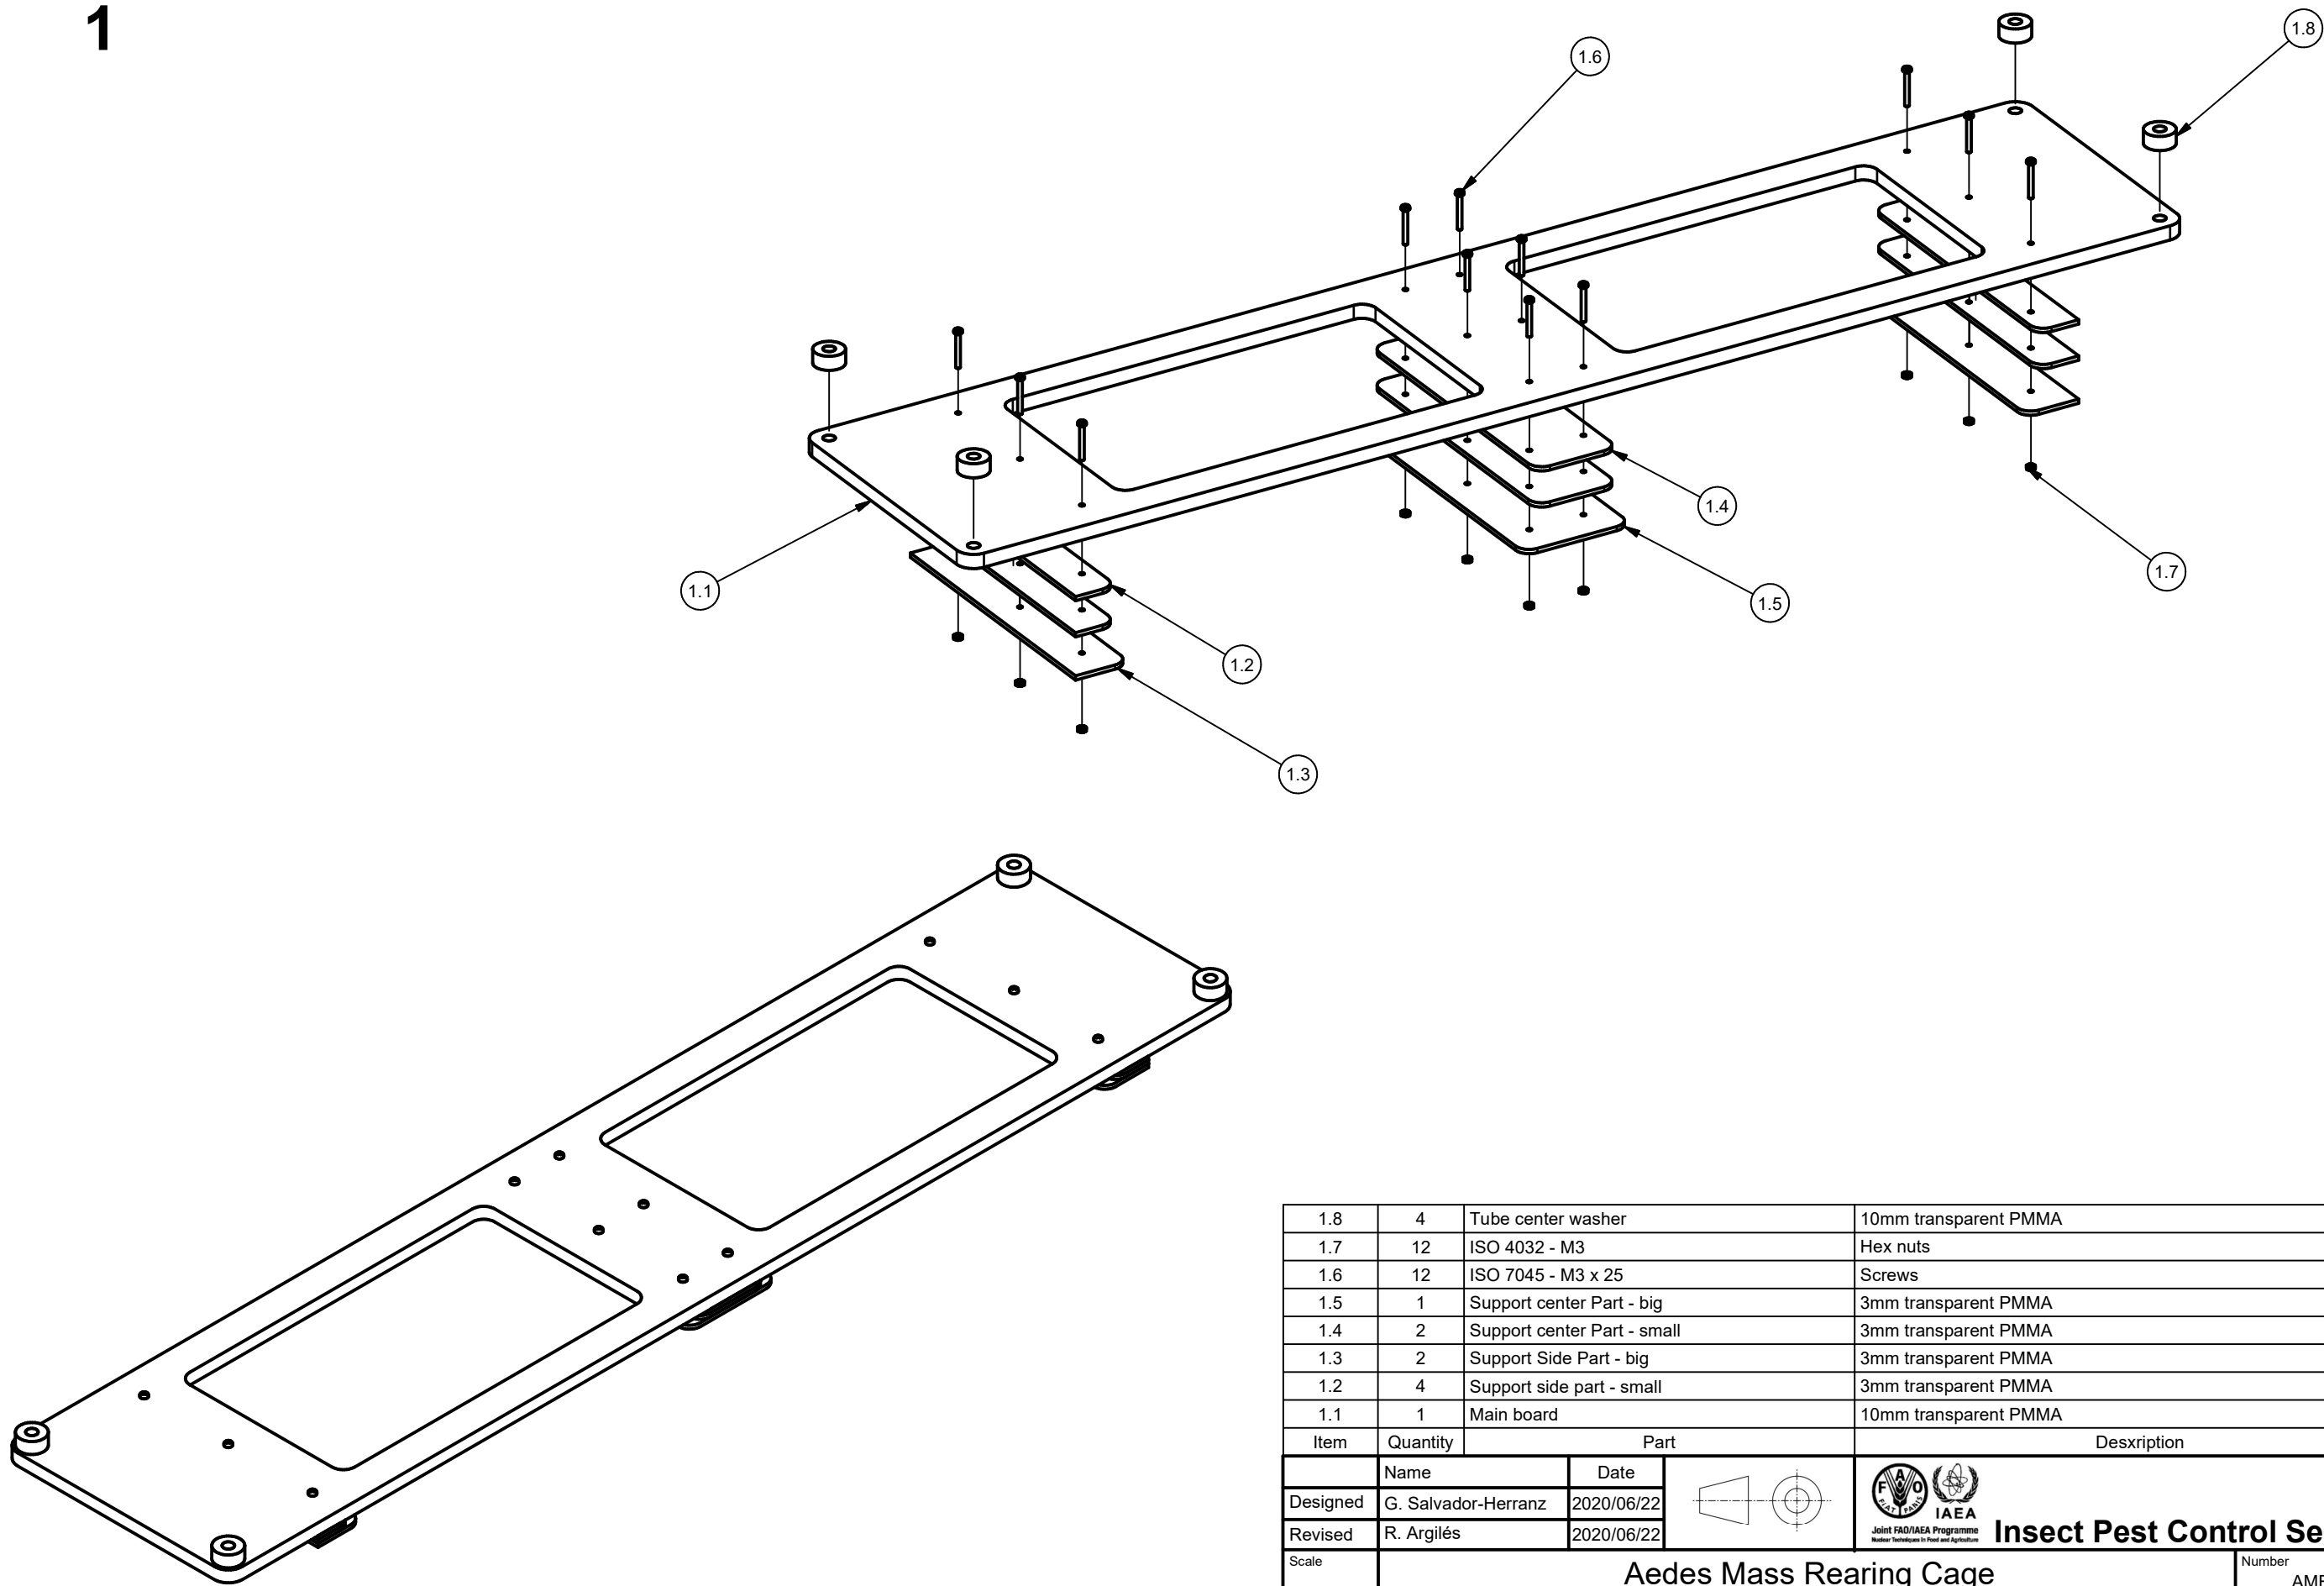

|          |                         |                             |                                                                                                                                                                                                                                                                                                                                             |
|----------|-------------------------|-----------------------------|---------------------------------------------------------------------------------------------------------------------------------------------------------------------------------------------------------------------------------------------------------------------------------------------------------------------------------------------|
| 1.8      | 4                       | Tube center washer          | 10mm transparent PMMA                                                                                                                                                                                                                                                                                                                       |
| 1.7      | 12                      | ISO 4032 - M3               | Hex nuts                                                                                                                                                                                                                                                                                                                                    |
| 1.6      | 12                      | ISO 7045 - M3 x 25          | Screws                                                                                                                                                                                                                                                                                                                                      |
| 1.5      | 1                       | Support center Part - big   | 3mm transparent PMMA                                                                                                                                                                                                                                                                                                                        |
| 1.4      | 2                       | Support center Part - small | 3mm transparent PMMA                                                                                                                                                                                                                                                                                                                        |
| 1.3      | 2                       | Support Side Part - big     | 3mm transparent PMMA                                                                                                                                                                                                                                                                                                                        |
| 1.2      | 4                       | Support side part - small   | 3mm transparent PMMA                                                                                                                                                                                                                                                                                                                        |
| 1.1      | 1                       | Main board                  | 10mm transparent PMMA                                                                                                                                                                                                                                                                                                                       |
| Item     | Quantity                | Part                        | Description                                                                                                                                                                                                                                                                                                                                 |
|          | Name                    | Date                        |   <br>Joint FAO/IAEA Programme<br>Nuclear Techniques in Food and Agriculture |
| Designed | G. Salvador-Herranz     | 2020/06/22                  |                                                                                                                                                                                                                                                                                                                                             |
| Revised  | R. Argilés              | 2020/06/22                  |                                                                                                                                                                                                                                                                                                                                             |
| Scale    | Aedes Mass Rearing Cage |                             | Number                                                                                                                                                                                                                                                                                                                                      |
| mm       | Bottom Tray Assembly    |                             | AMRC_V1                                                                                                                                                                                                                                                                                                                                     |
|          |                         |                             | Sheet                                                                                                                                                                                                                                                                                                                                       |
|          |                         |                             | 3/7                                                                                                                                                                                                                                                                                                                                         |
