# Supplementary material for: Assessment of a Novel Adult Mass-Rearing Cage for Aedes albopictus (Skuse) and Anopheles arabiensis (Patton)
Source: MDPI journal article supplement (doi:10.3390/insects11110801), 2020-11-13
Supplement: s1 [file s1]

2

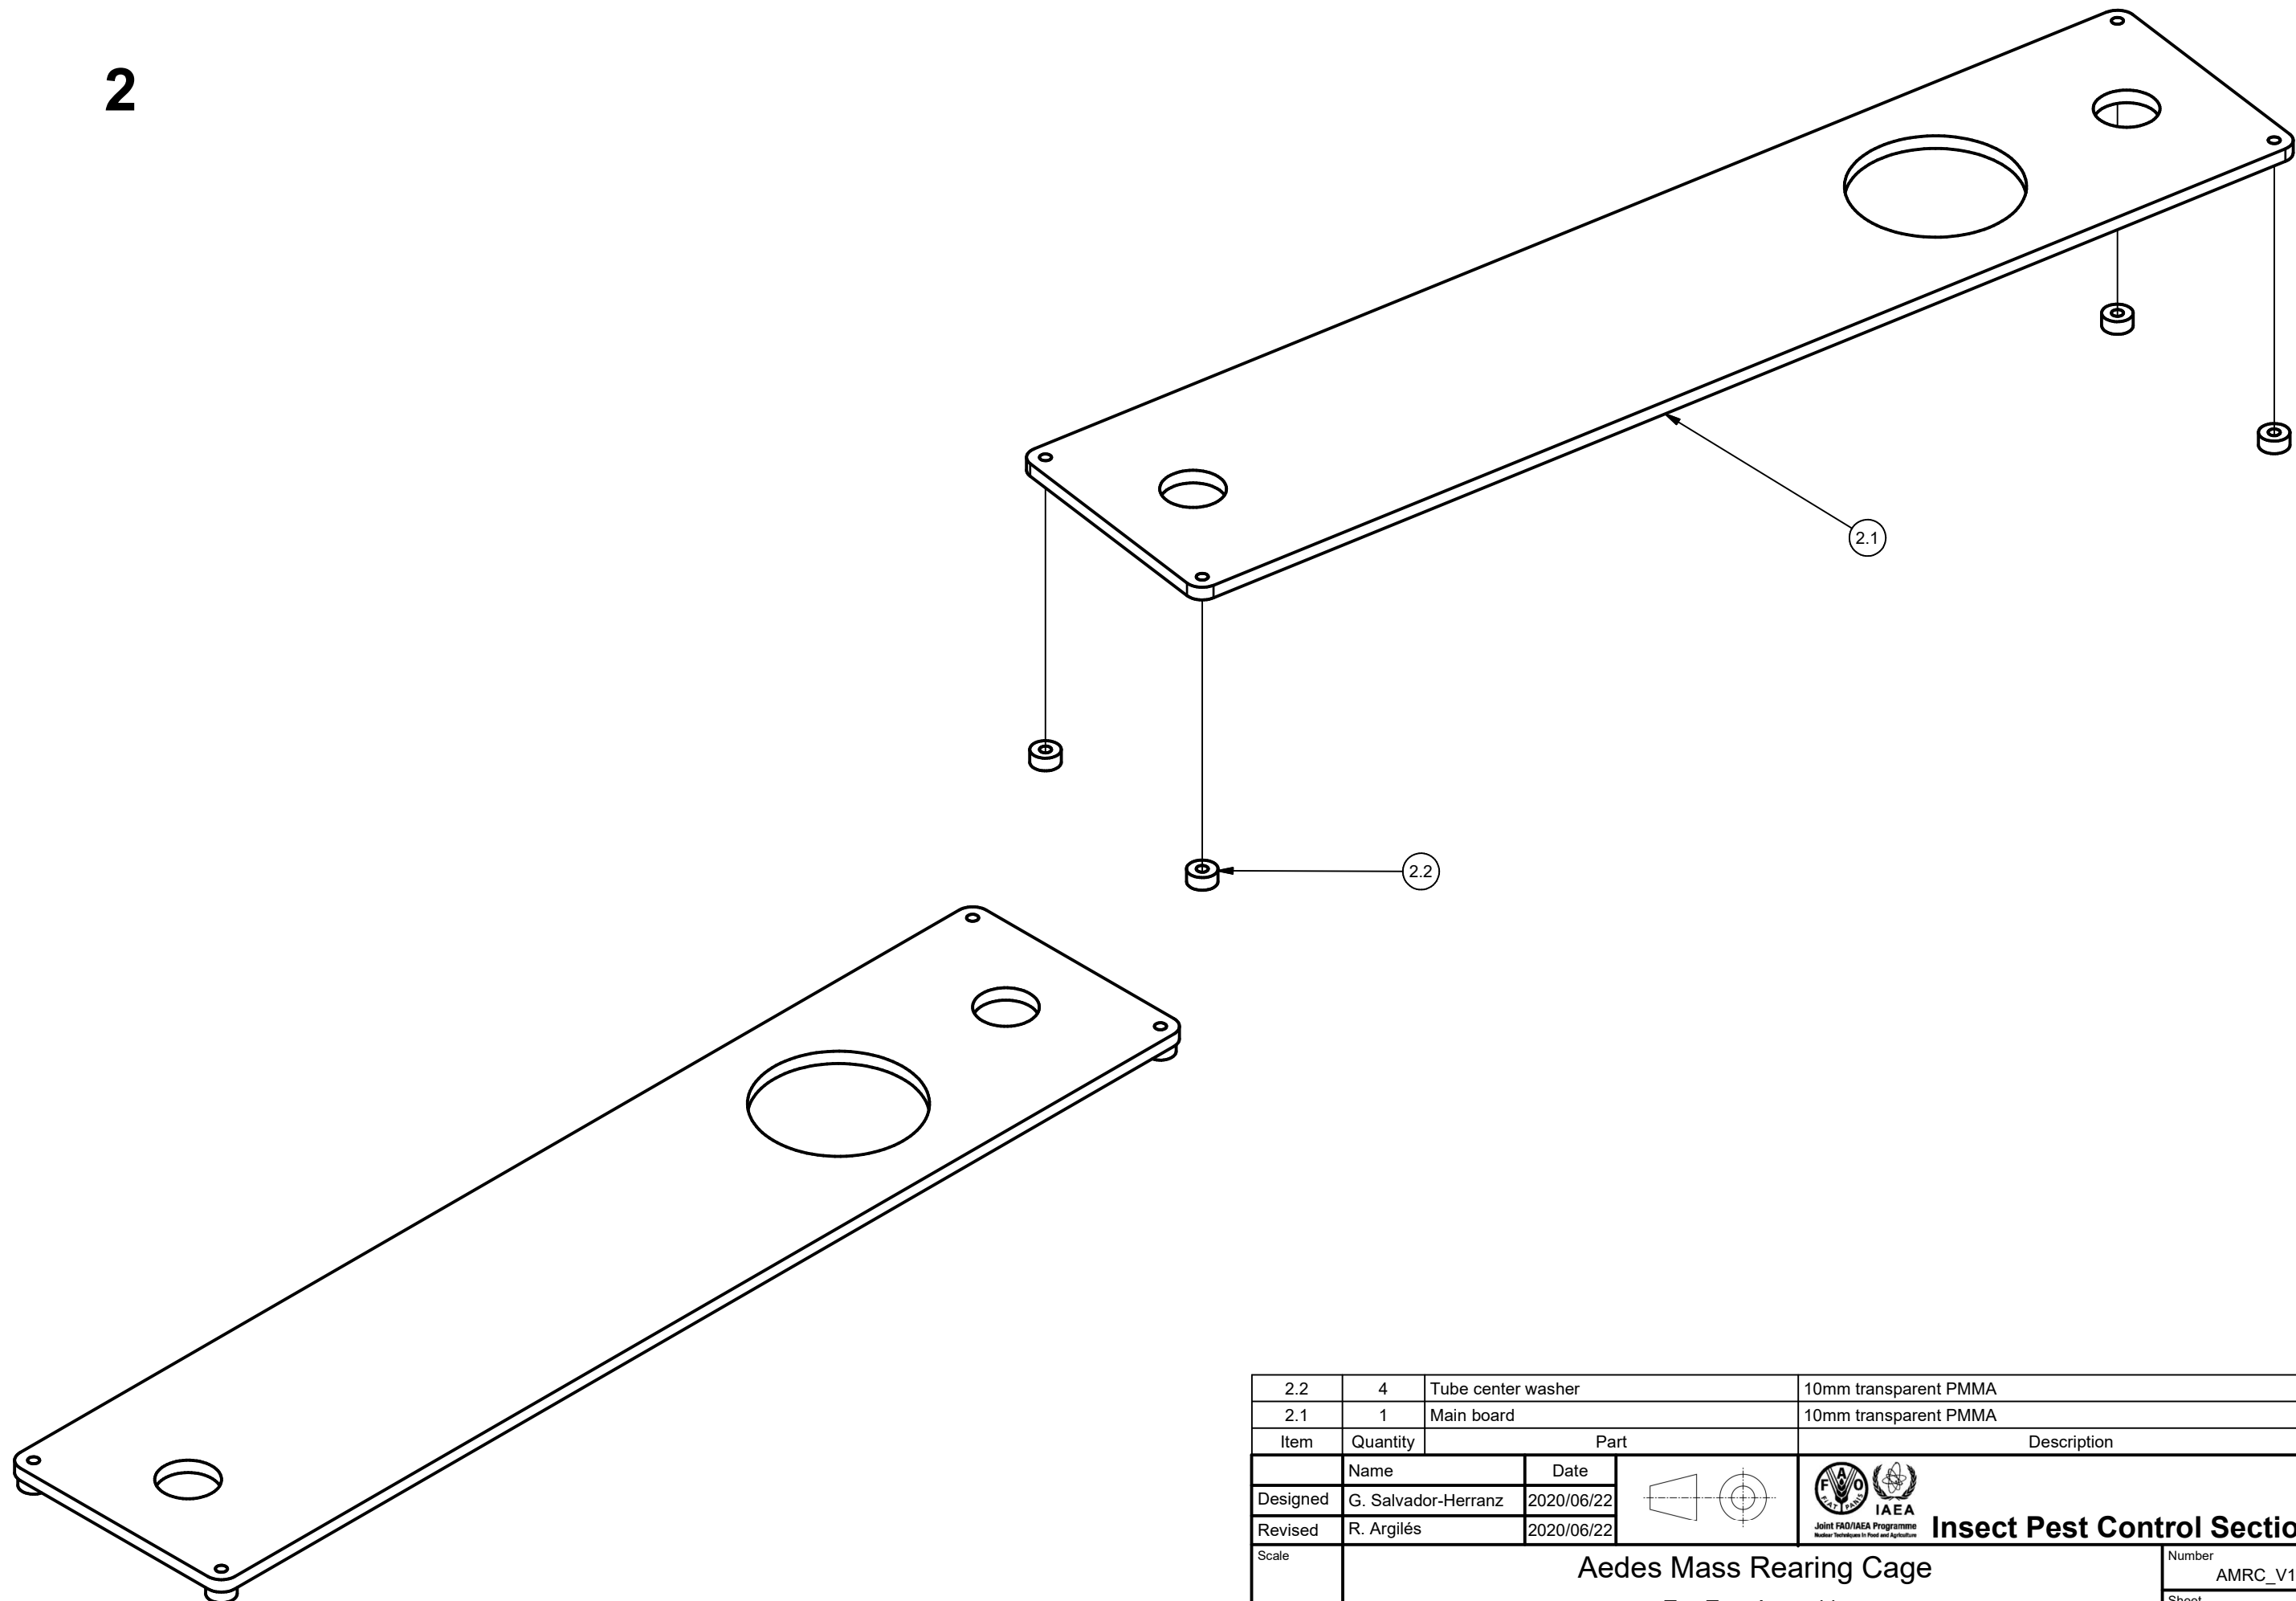

|          |                         |                    |            |                                                                                                                                                                                                                                                                                              |         |
|----------|-------------------------|--------------------|------------|----------------------------------------------------------------------------------------------------------------------------------------------------------------------------------------------------------------------------------------------------------------------------------------------|---------|
| 2.2      | 4                       | Tube center washer |            | 10mm transparent PMMA                                                                                                                                                                                                                                                                        |         |
| 2.1      | 1                       | Main board         |            | 10mm transparent PMMA                                                                                                                                                                                                                                                                        |         |
| Item     | Quantity                | Part               |            | Description                                                                                                                                                                                                                                                                                  |         |
|          | Name                    |                    | Date       | <div><div><div></div><div></div></div><div><div></div><div></div></div></div> <div><div><div></div><div></div></div><div><div></div><div></div></div></div> <div>Joint FAO/IAEA Programme<br/>Nuclear Techniques in Food and Agriculture</div> <div><b>Insect Pest Control Section</b></div> |         |
| Designed | G. Salvador-Herranz     |                    | 2020/06/22 |                                                                                                                                                                                                                                                                                              |         |
| Revised  | R. Argilés              |                    | 2020/06/22 |                                                                                                                                                                                                                                                                                              |         |
| Scale    | Aedes Mass Rearing Cage |                    |            |                                                                                                                                                                                                                                                                                              | Number  |
| mm       | Top Tray Assembly       |                    |            |                                                                                                                                                                                                                                                                                              | AMRC_V1 |
|          |                         |                    |            |                                                                                                                                                                                                                                                                                              | Sheet   |
|          |                         |                    |            |                                                                                                                                                                                                                                                                                              | 4/7     |
