# Supplementary material for: Assessment of a Novel Adult Mass-Rearing Cage for Aedes albopictus (Skuse) and Anopheles arabiensis (Patton)
Source: MDPI journal article supplement (doi:10.3390/insects11110801), 2020-11-13
Supplement: s1 [file s1]

2.1

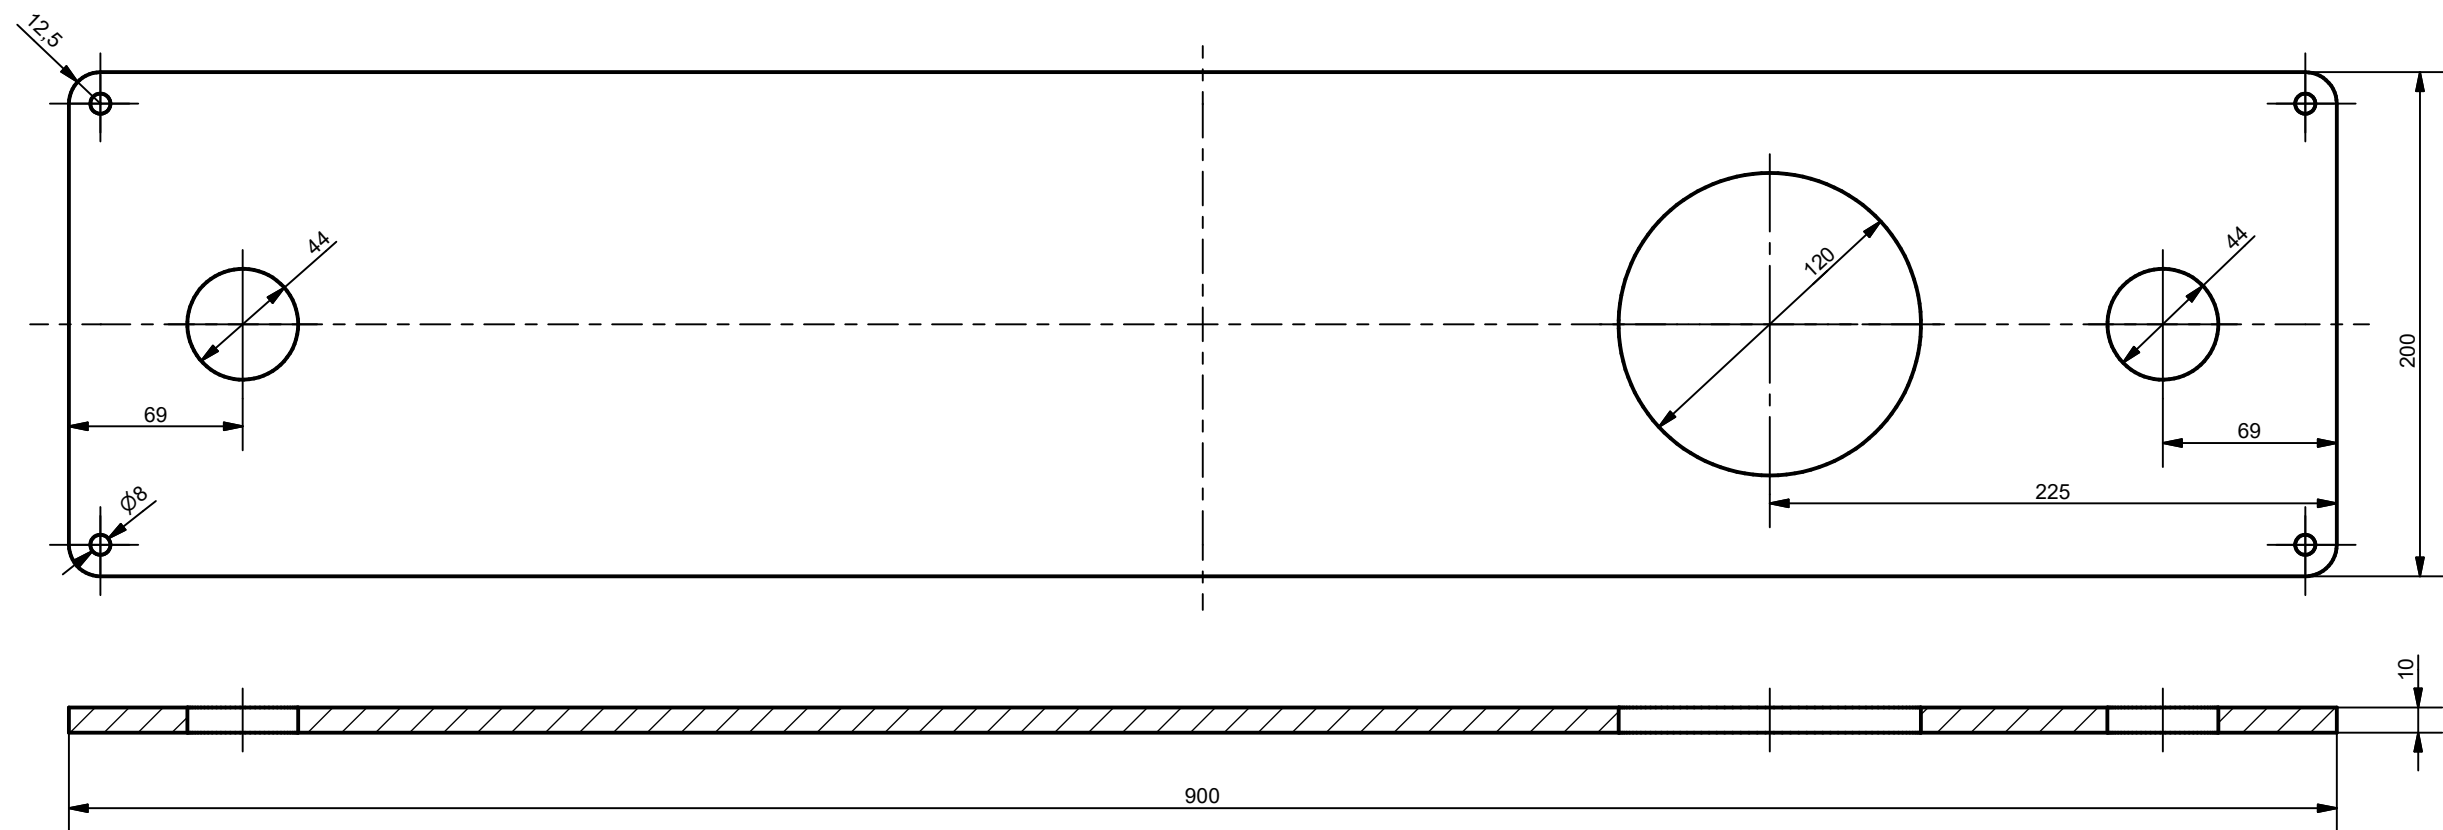

2.2

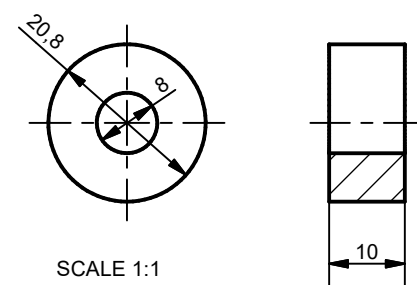

|          |                         |            |                                                                                                                                                                                                                |
|----------|-------------------------|------------|----------------------------------------------------------------------------------------------------------------------------------------------------------------------------------------------------------------|
|          | Name                    | Date       | 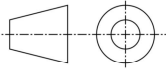  <b>Insect Pest Control Section</b> |
| Designed | G. Salvador-Herranz     | 2020/06/22 |                                                                                                                                                                                                                |
| Revised  | R. Argilés              | 2020/06/22 |                                                                                                                                                                                                                |
| Scale    | Aedes Mass Rearing Cage |            | Number                                                                                                                                                                                                         |
| 1:3      | Top Tray - Parts        |            | AMRC_V1                                                                                                                                                                                                        |
| mm       |                         |            | Sheet                                                                                                                                                                                                          |
|          |                         |            | 6/7                                                                                                                                                                                                            |
