# Supplementary material for: Assessment of a Novel Adult Mass-Rearing Cage for Aedes albopictus (Skuse) and Anopheles arabiensis (Patton)
Source: MDPI journal article supplement (doi:10.3390/insects11110801), 2020-11-13
Supplement: s1 [file s1]

6

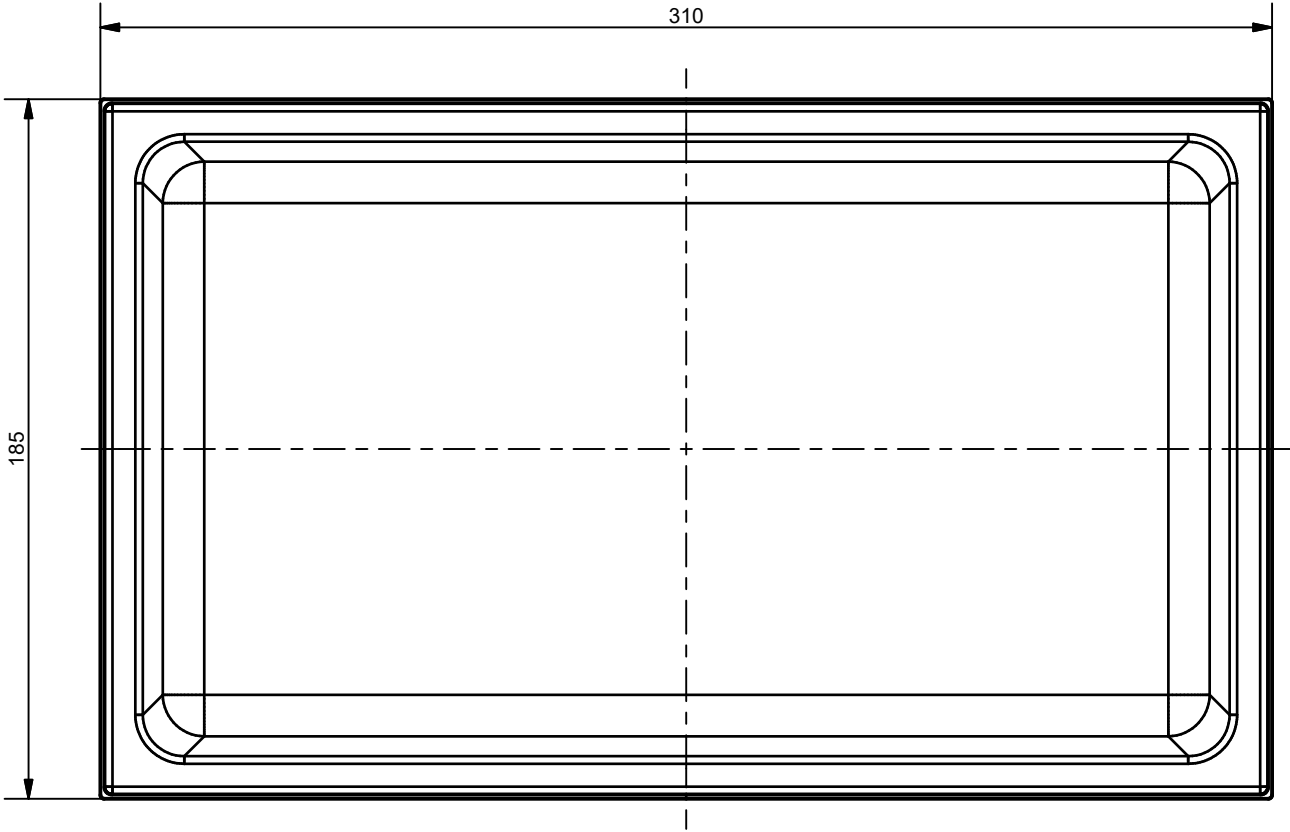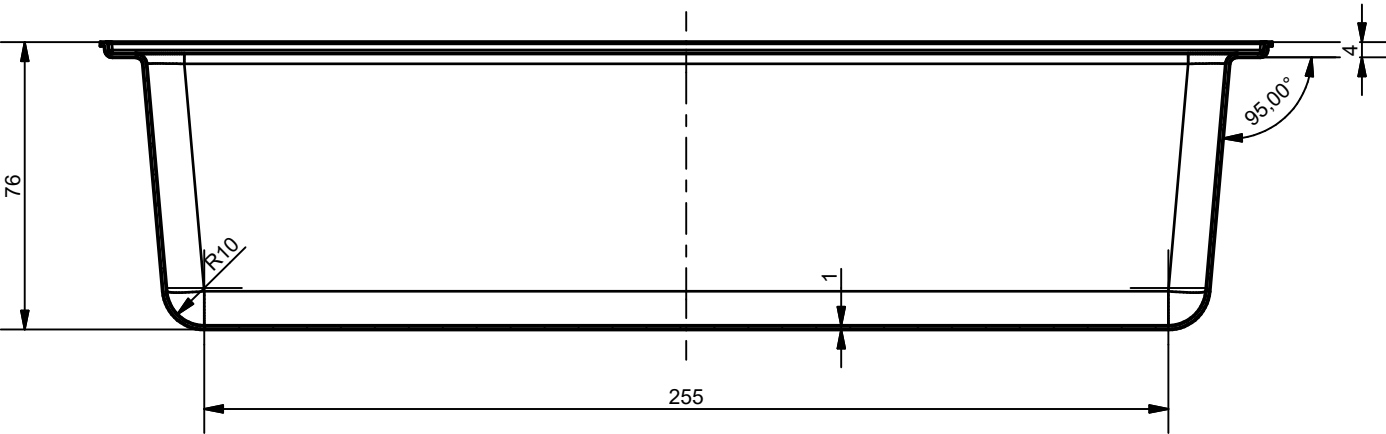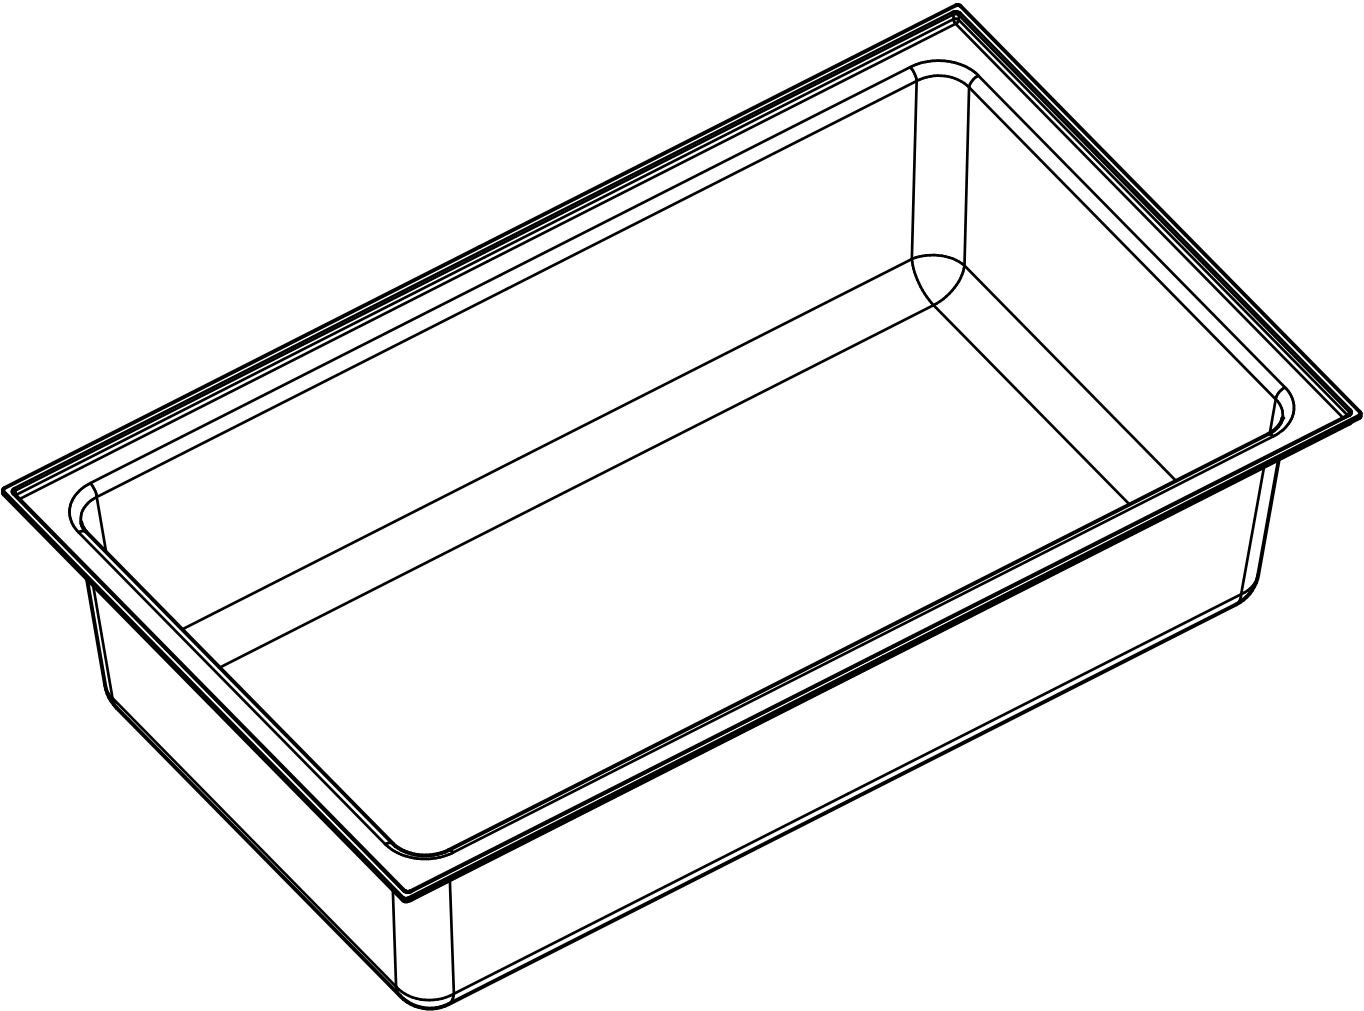

|          |                                |            |                                                                                                                                                                                                                |
|----------|--------------------------------|------------|----------------------------------------------------------------------------------------------------------------------------------------------------------------------------------------------------------------|
|          | Name                           | Date       | 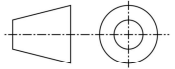  <b>Insect Pest Control Section</b> |
| Designed | G. Salvador-Herranz            | 2020/06/22 |                                                                                                                                                                                                                |
| Revised  | R. Argilés                     | 2020/06/22 |                                                                                                                                                                                                                |
| Scale    | <b>Aedes Mass Rearing Cage</b> |            | Number                                                                                                                                                                                                         |
| 1:2      | Container                      |            | AMRC_V1                                                                                                                                                                                                        |
| mm       |                                |            | Sheet                                                                                                                                                                                                          |
|          |                                |            | 8/7                                                                                                                                                                                                            |
