# Supplementary material for: Assessment of a Novel Adult Mass-Rearing Cage for Aedes albopictus (Skuse) and Anopheles arabiensis (Patton)
Source: MDPI journal article supplement (doi:10.3390/insects11110801), 2020-11-13
Supplement: s1 [file s1]

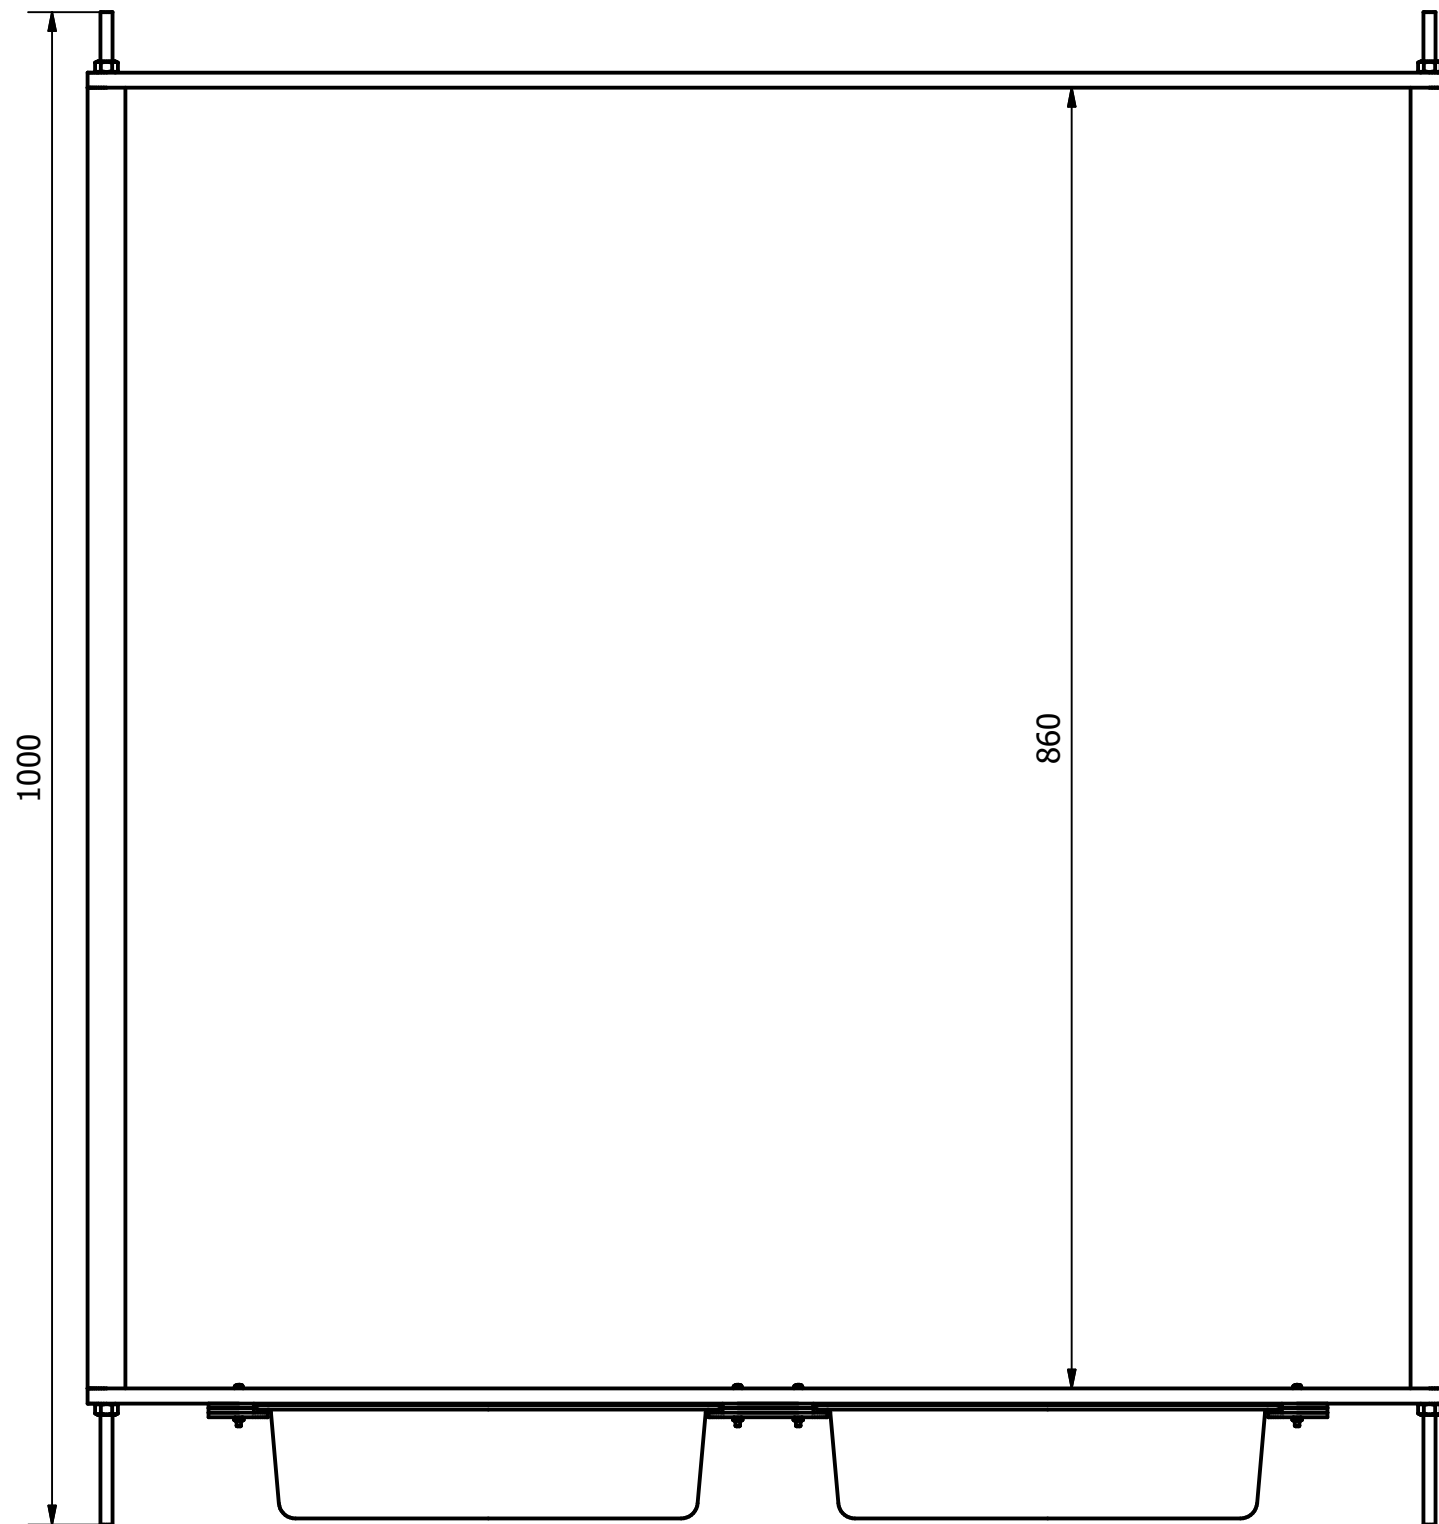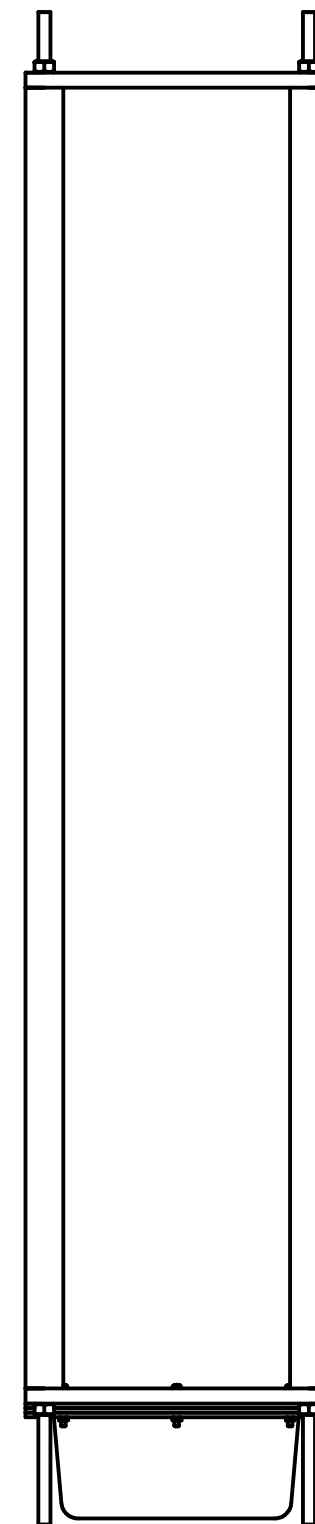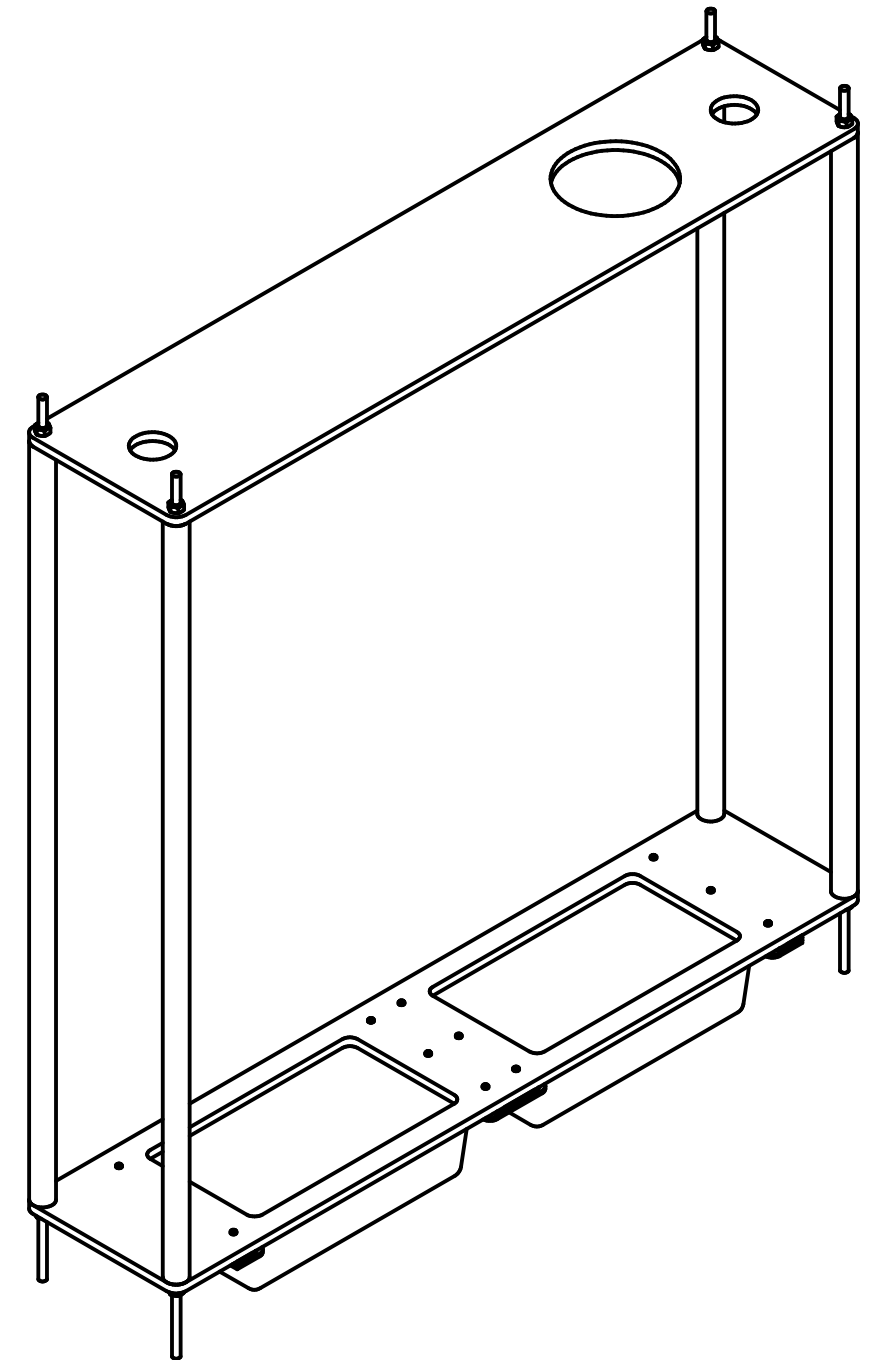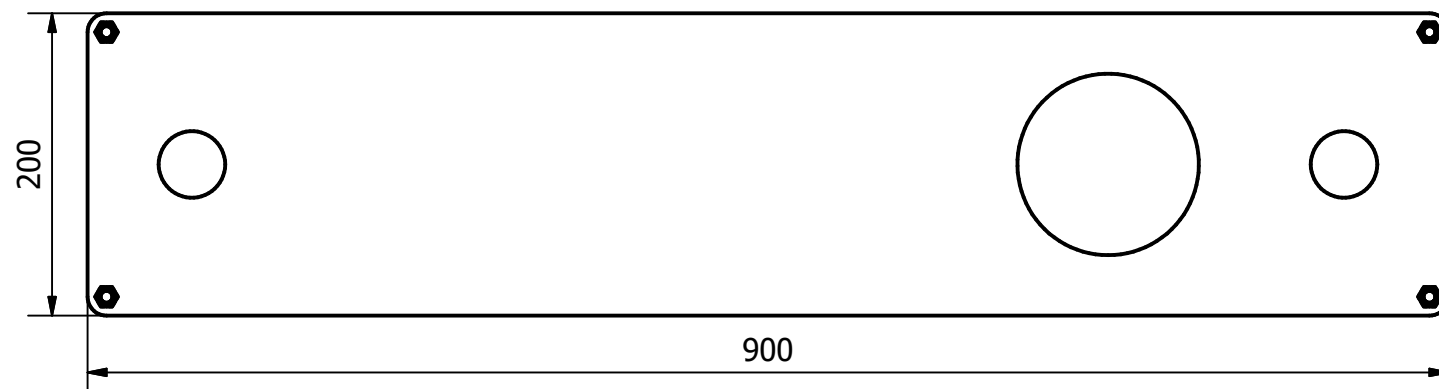

|          |                                                    |            |  |                                                                                                                                                                                                                                                       |                                    |         |
|----------|----------------------------------------------------|------------|--|-------------------------------------------------------------------------------------------------------------------------------------------------------------------------------------------------------------------------------------------------------|------------------------------------|---------|
|          | Name                                               | Date       |  |  <br>Joint FAO/IAEA Programme<br>Nuclear Techniques in Food and Agriculture | <b>Insect Pest Control Section</b> |         |
| Designed | G. Salvador-Herranz                                | 2020/06/22 |  |                                                                                                                                                                                                                                                       |                                    |         |
| Revised  | R. Argilés                                         | 2020/06/22 |  |                                                                                                                                                                                                                                                       |                                    |         |
| Scale    | <b>Aedes Mass Rearing Cage</b><br><br>Overall View |            |  |                                                                                                                                                                                                                                                       | Number                             | AMRC_V1 |
| 1/5 mm   |                                                    |            |  |                                                                                                                                                                                                                                                       | Sheet                              | 1/7     |
