# Supplementary material for: Assessment of a Novel Adult Mass-Rearing Cage for Aedes albopictus (Skuse) and Anopheles arabiensis (Patton)
Source: MDPI journal article supplement (doi:10.3390/insects11110801), 2020-11-13
Supplement: s1 [file s1]

# 1.1

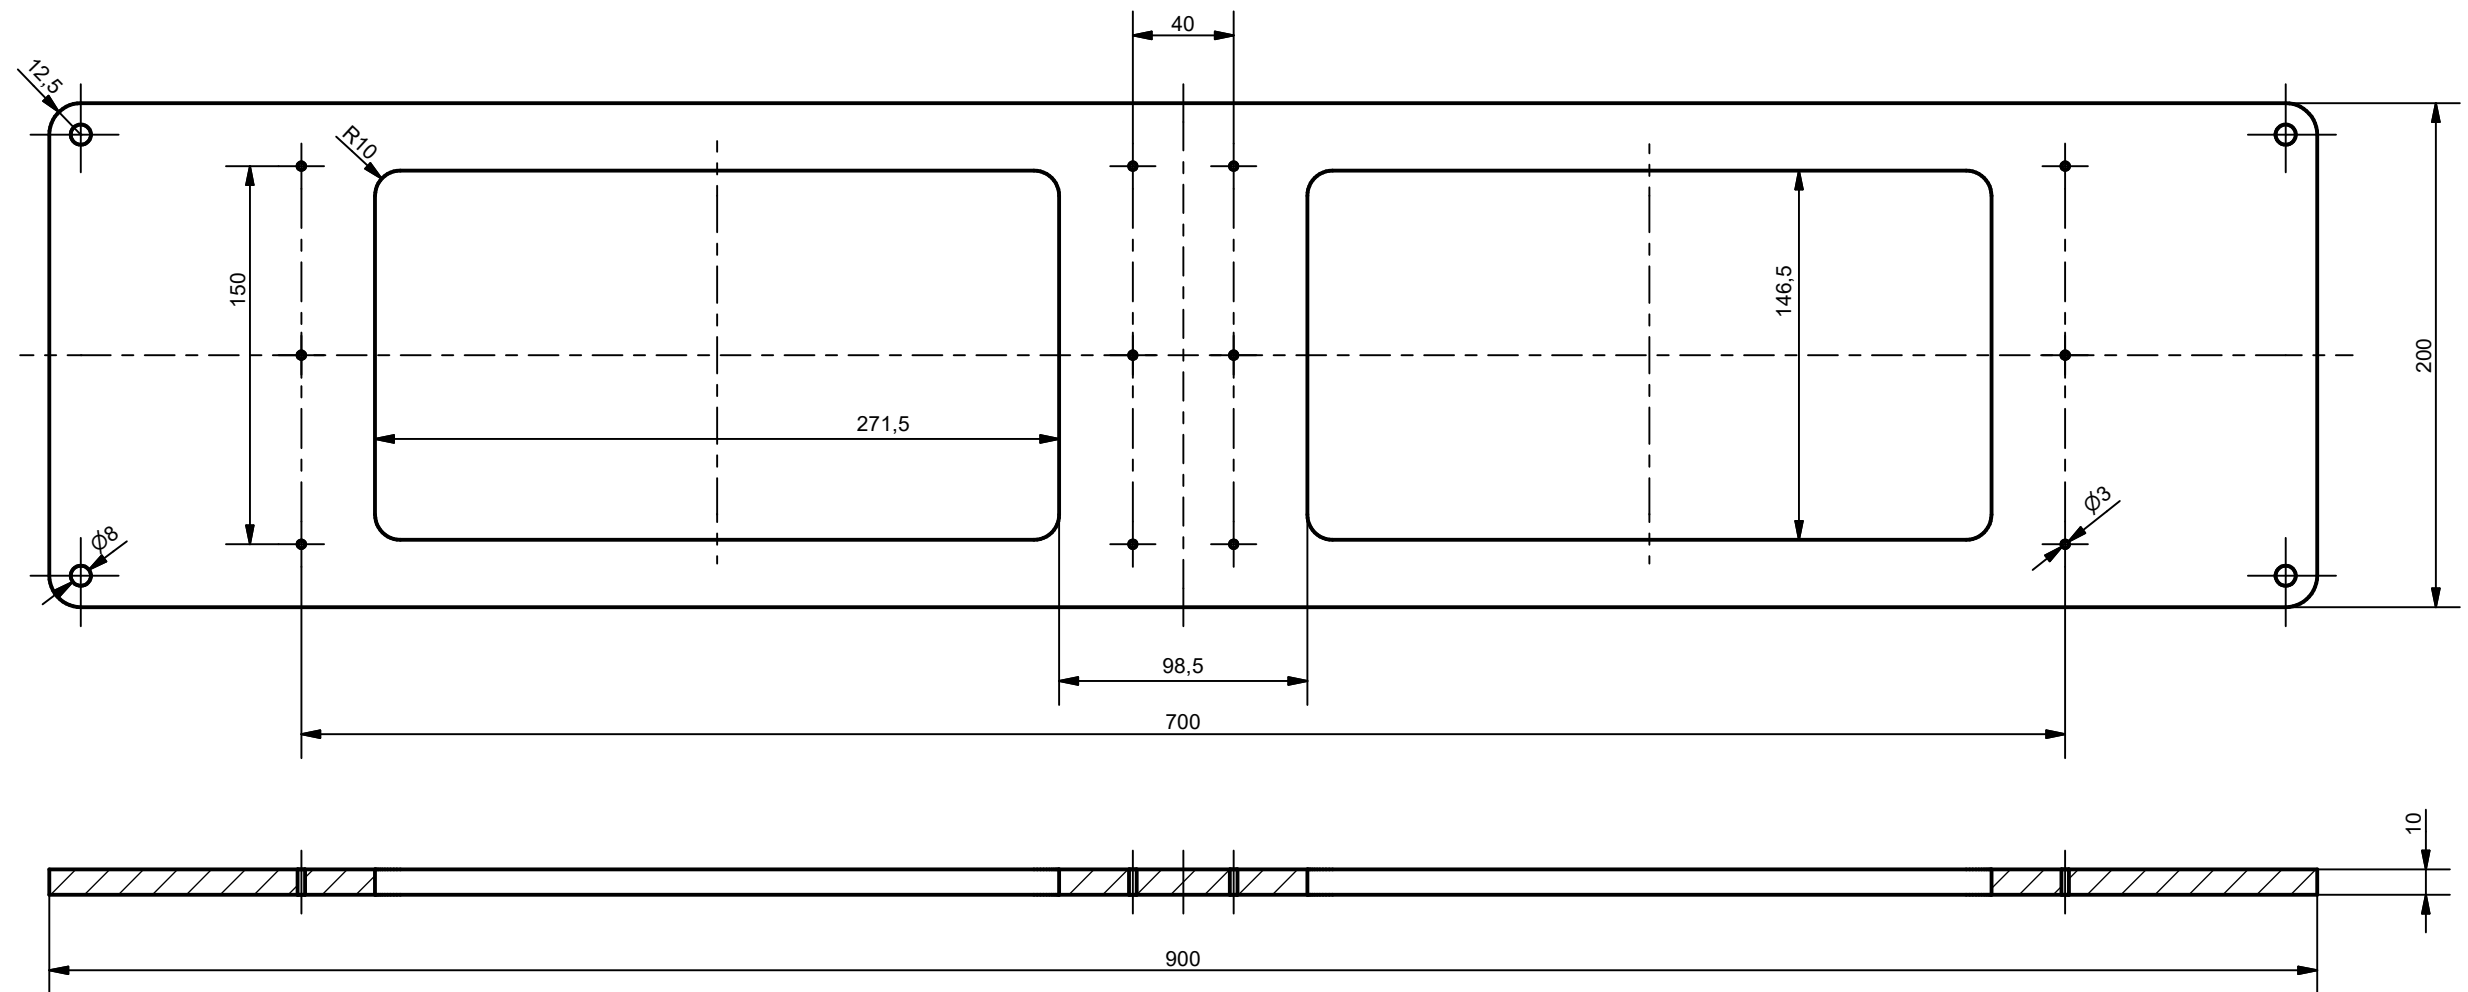

# 1.2

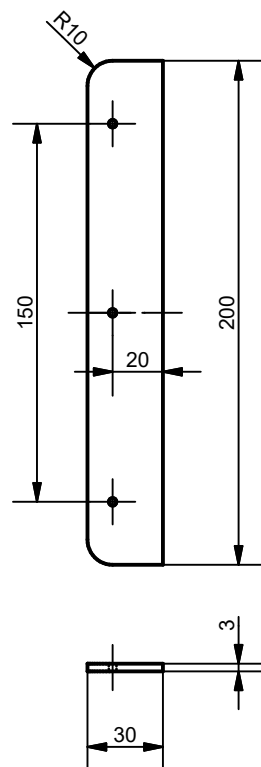

# 1.3

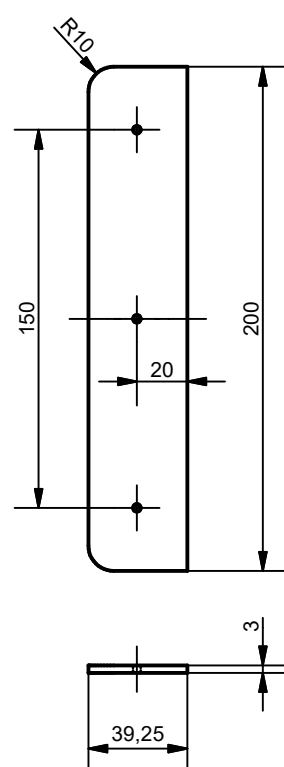

# 1.4

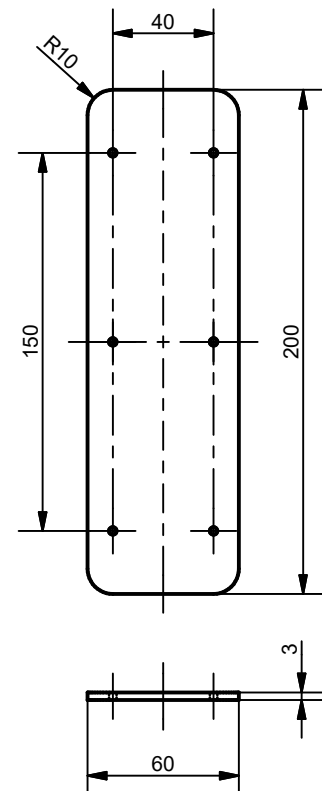

# 1.5

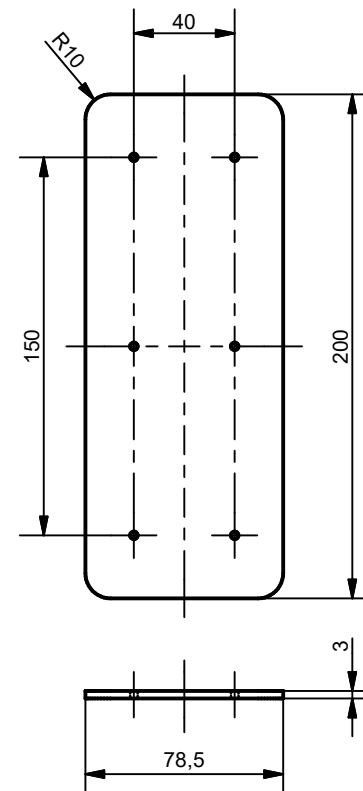

# 1.8

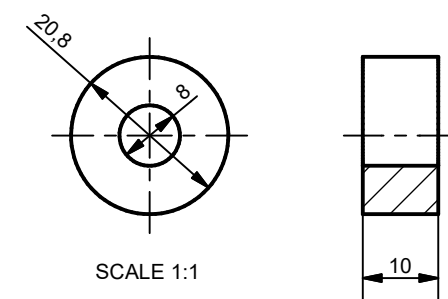

|          |                                                           |            |                                                                                       |                                                                                                                                                                                                                                                       |                                    |
|----------|-----------------------------------------------------------|------------|---------------------------------------------------------------------------------------|-------------------------------------------------------------------------------------------------------------------------------------------------------------------------------------------------------------------------------------------------------|------------------------------------|
|          | Name                                                      | Date       |  |  <br>Joint FAO/IAEA Programme<br>Nuclear Techniques in Food and Agriculture | <b>Insect Pest Control Section</b> |
| Designed | G. Salvador-Herranz                                       | 2020/06/22 |                                                                                       |                                                                                                                                                                                                                                                       |                                    |
| Revised  | R. Argilés                                                | 2020/06/22 |                                                                                       |                                                                                                                                                                                                                                                       |                                    |
| Scale    | <b>Aedes Mass Rearing Cage</b><br><br>Bottom Tray - Parts |            |                                                                                       |                                                                                                                                                                                                                                                       | Number<br>AMRC_V1                  |
| 1:3      |                                                           |            |                                                                                       |                                                                                                                                                                                                                                                       | Sheet                              |
| mm       |                                                           |            |                                                                                       |                                                                                                                                                                                                                                                       | 5/7                                |
