# Supplementary figures and images for: Assessment of a Novel Adult Mass-Rearing Cage for Aedes albopictus (Skuse) and Anopheles arabiensis (Patton)
Source: MDPI journal article supplement (doi:10.3390/insects11110801), 2020-11-13

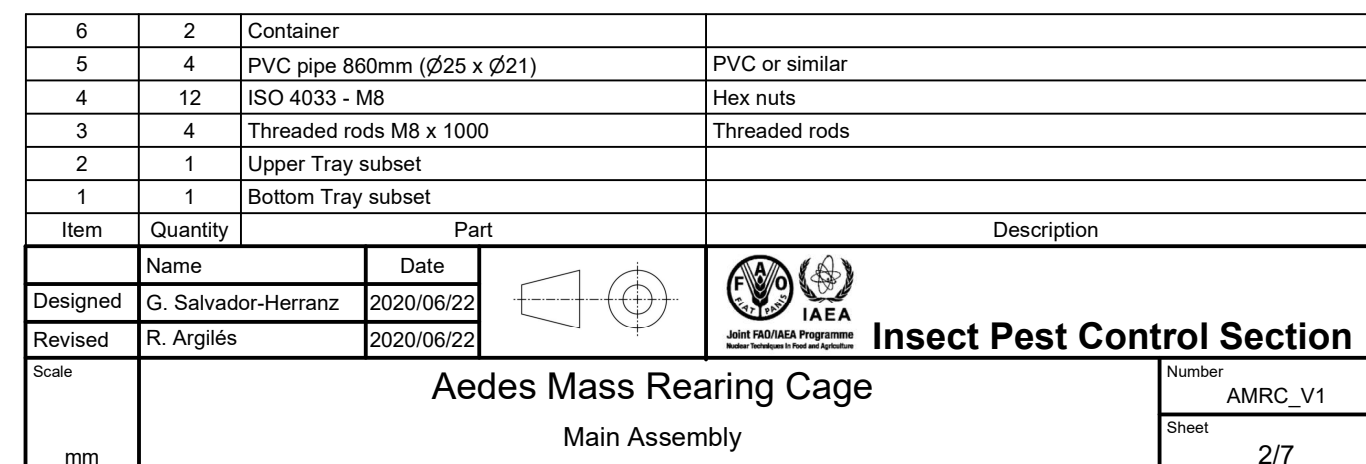

Supplement: s1 [file s1]
